# Supplementary material
Source: PubMed Central journal article supplement (PMC8241235)
Supplement: NIHMS1695680-supplement-Supplementary_File.pdf [file NIHMS1695680-supplement-Supplementary_File.pdf]

**Supplemental information**

**Promotion of cholangiocarcinoma growth by diverse  
cancer-associated fibroblast subpopulations**

**Silvia Affo, Ajay Nair, Francesco Brundu, Aashreya Ravichandra, Sonakshi Bhattacharjee, Michitaka Matsuda, LiKang Chin, Aveline Filliol, Wen Wen, Xinhua Song, Aubrianna Decker, Jeremy Worley, Jorge Matias Caviglia, Lexing Yu, Deqi Yin, Yoshinobu Saito, Thomas Savage, Rebecca G. Wells, Matthias Mack, Lars Zender, Nicholas Arpaia, Helen E. Remotti, Raul Rabadan, Peter Sims, Anne-Laure Leblond, Achim Weber, Marc-Oliver Riener, Brent R. Stockwell, Jellert Gaublonne, Josep M. Llovet, Raghu Kalluri, George K. Michalopoulos, Ekihiro Seki, Daniela Sia, Xin Chen, Andrea Califano, and Robert F. Schwabe**

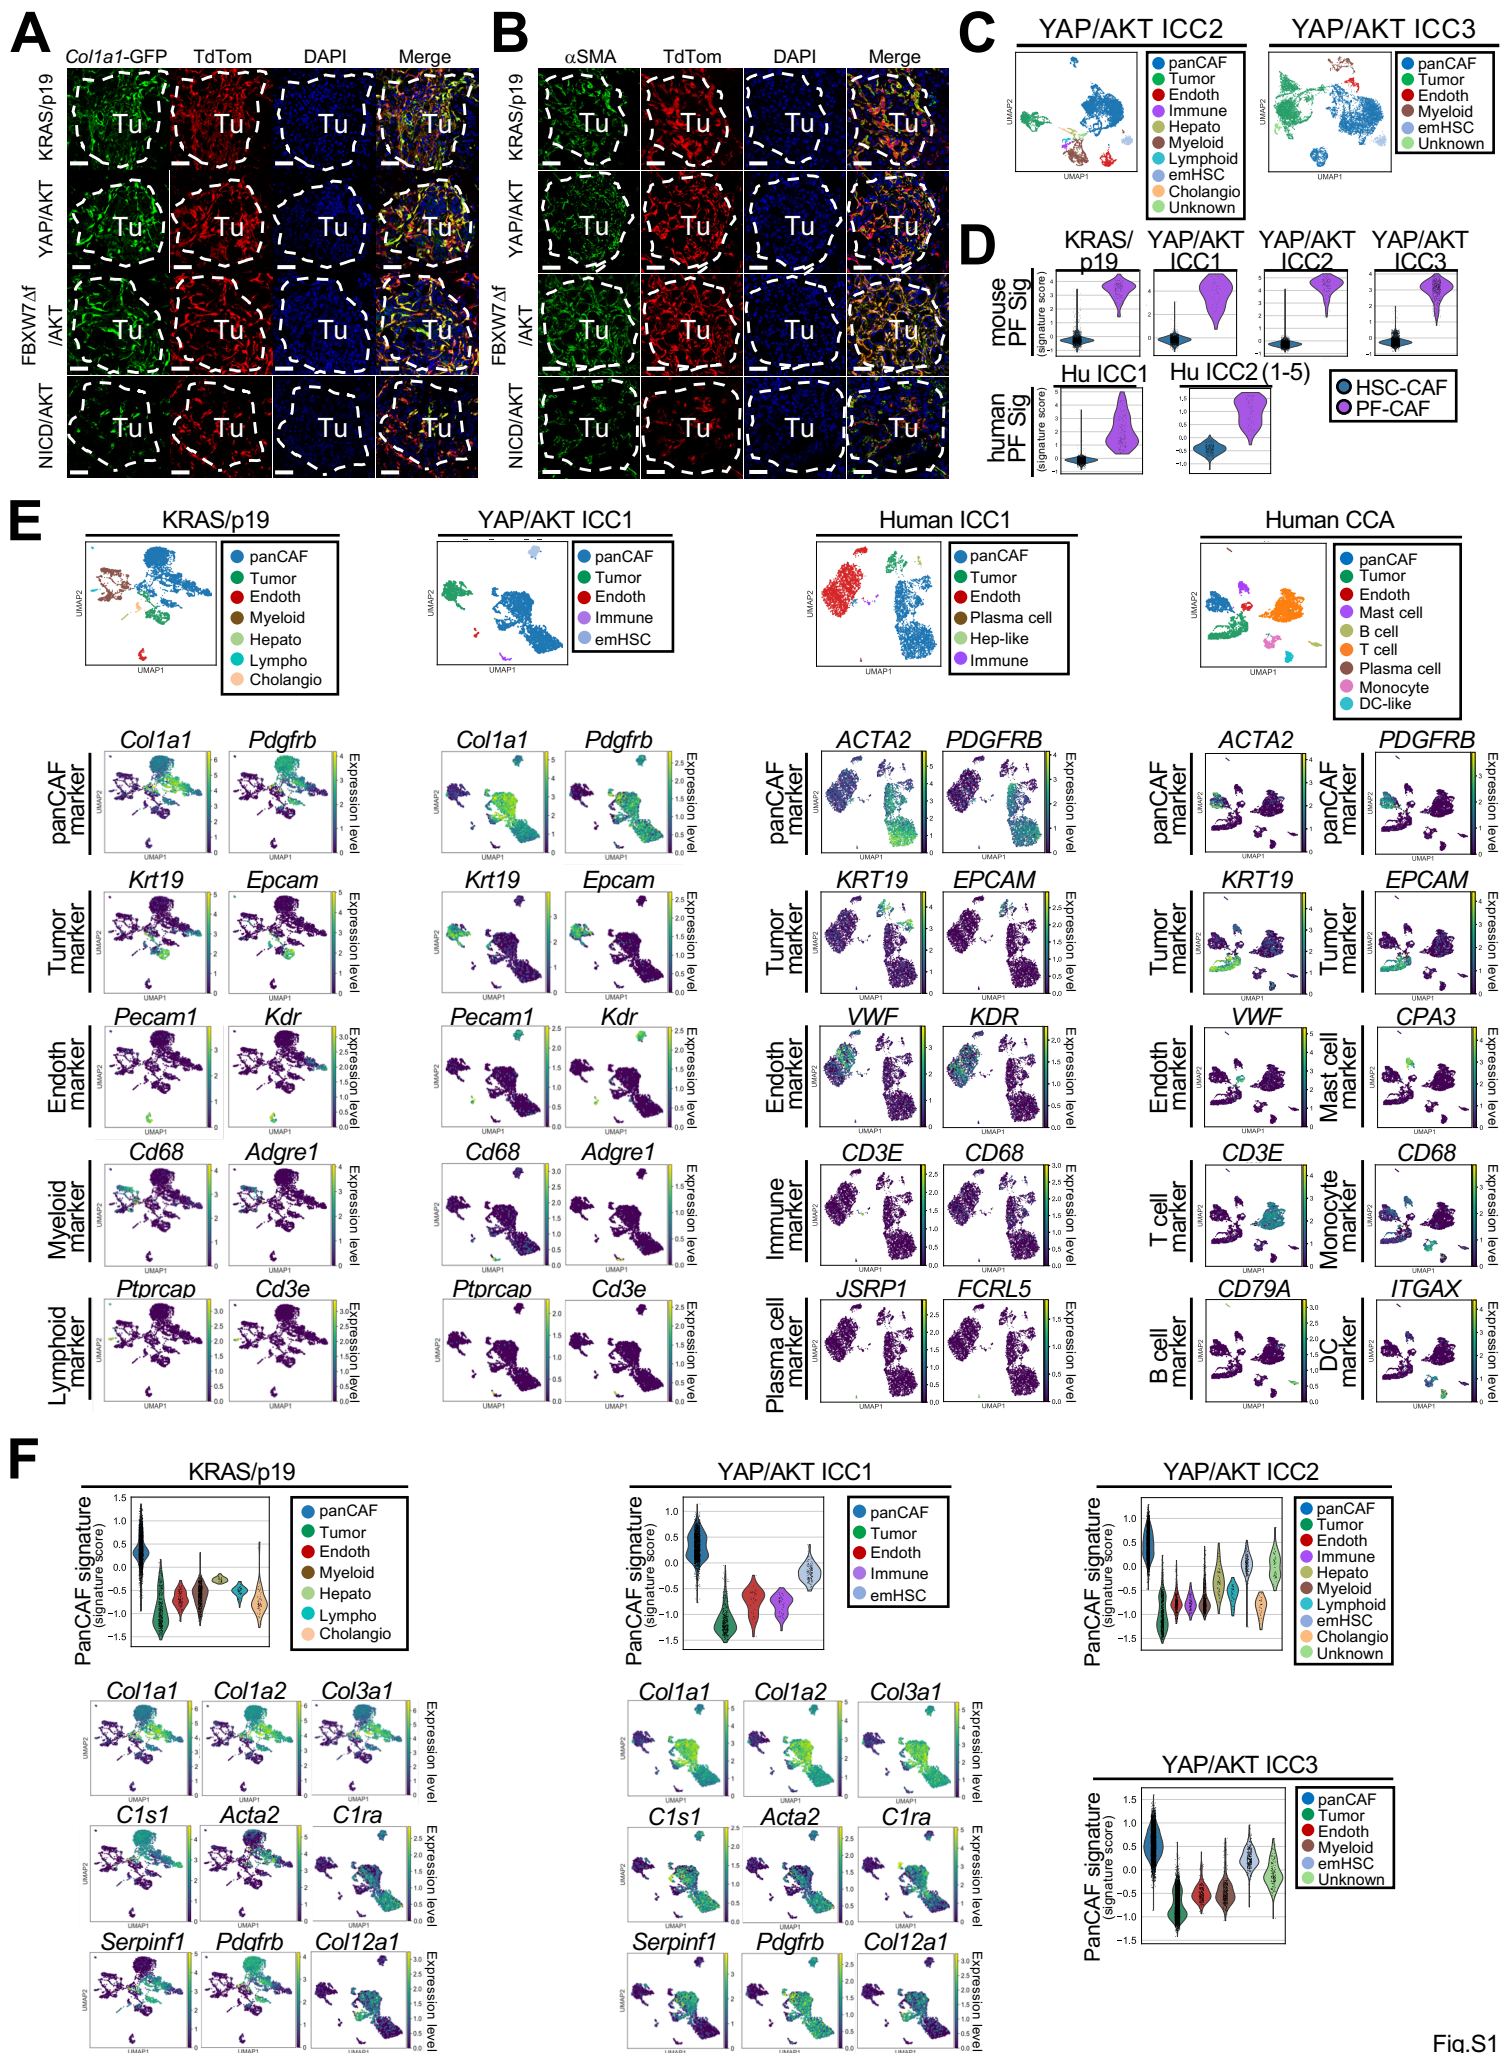

Fig.S1

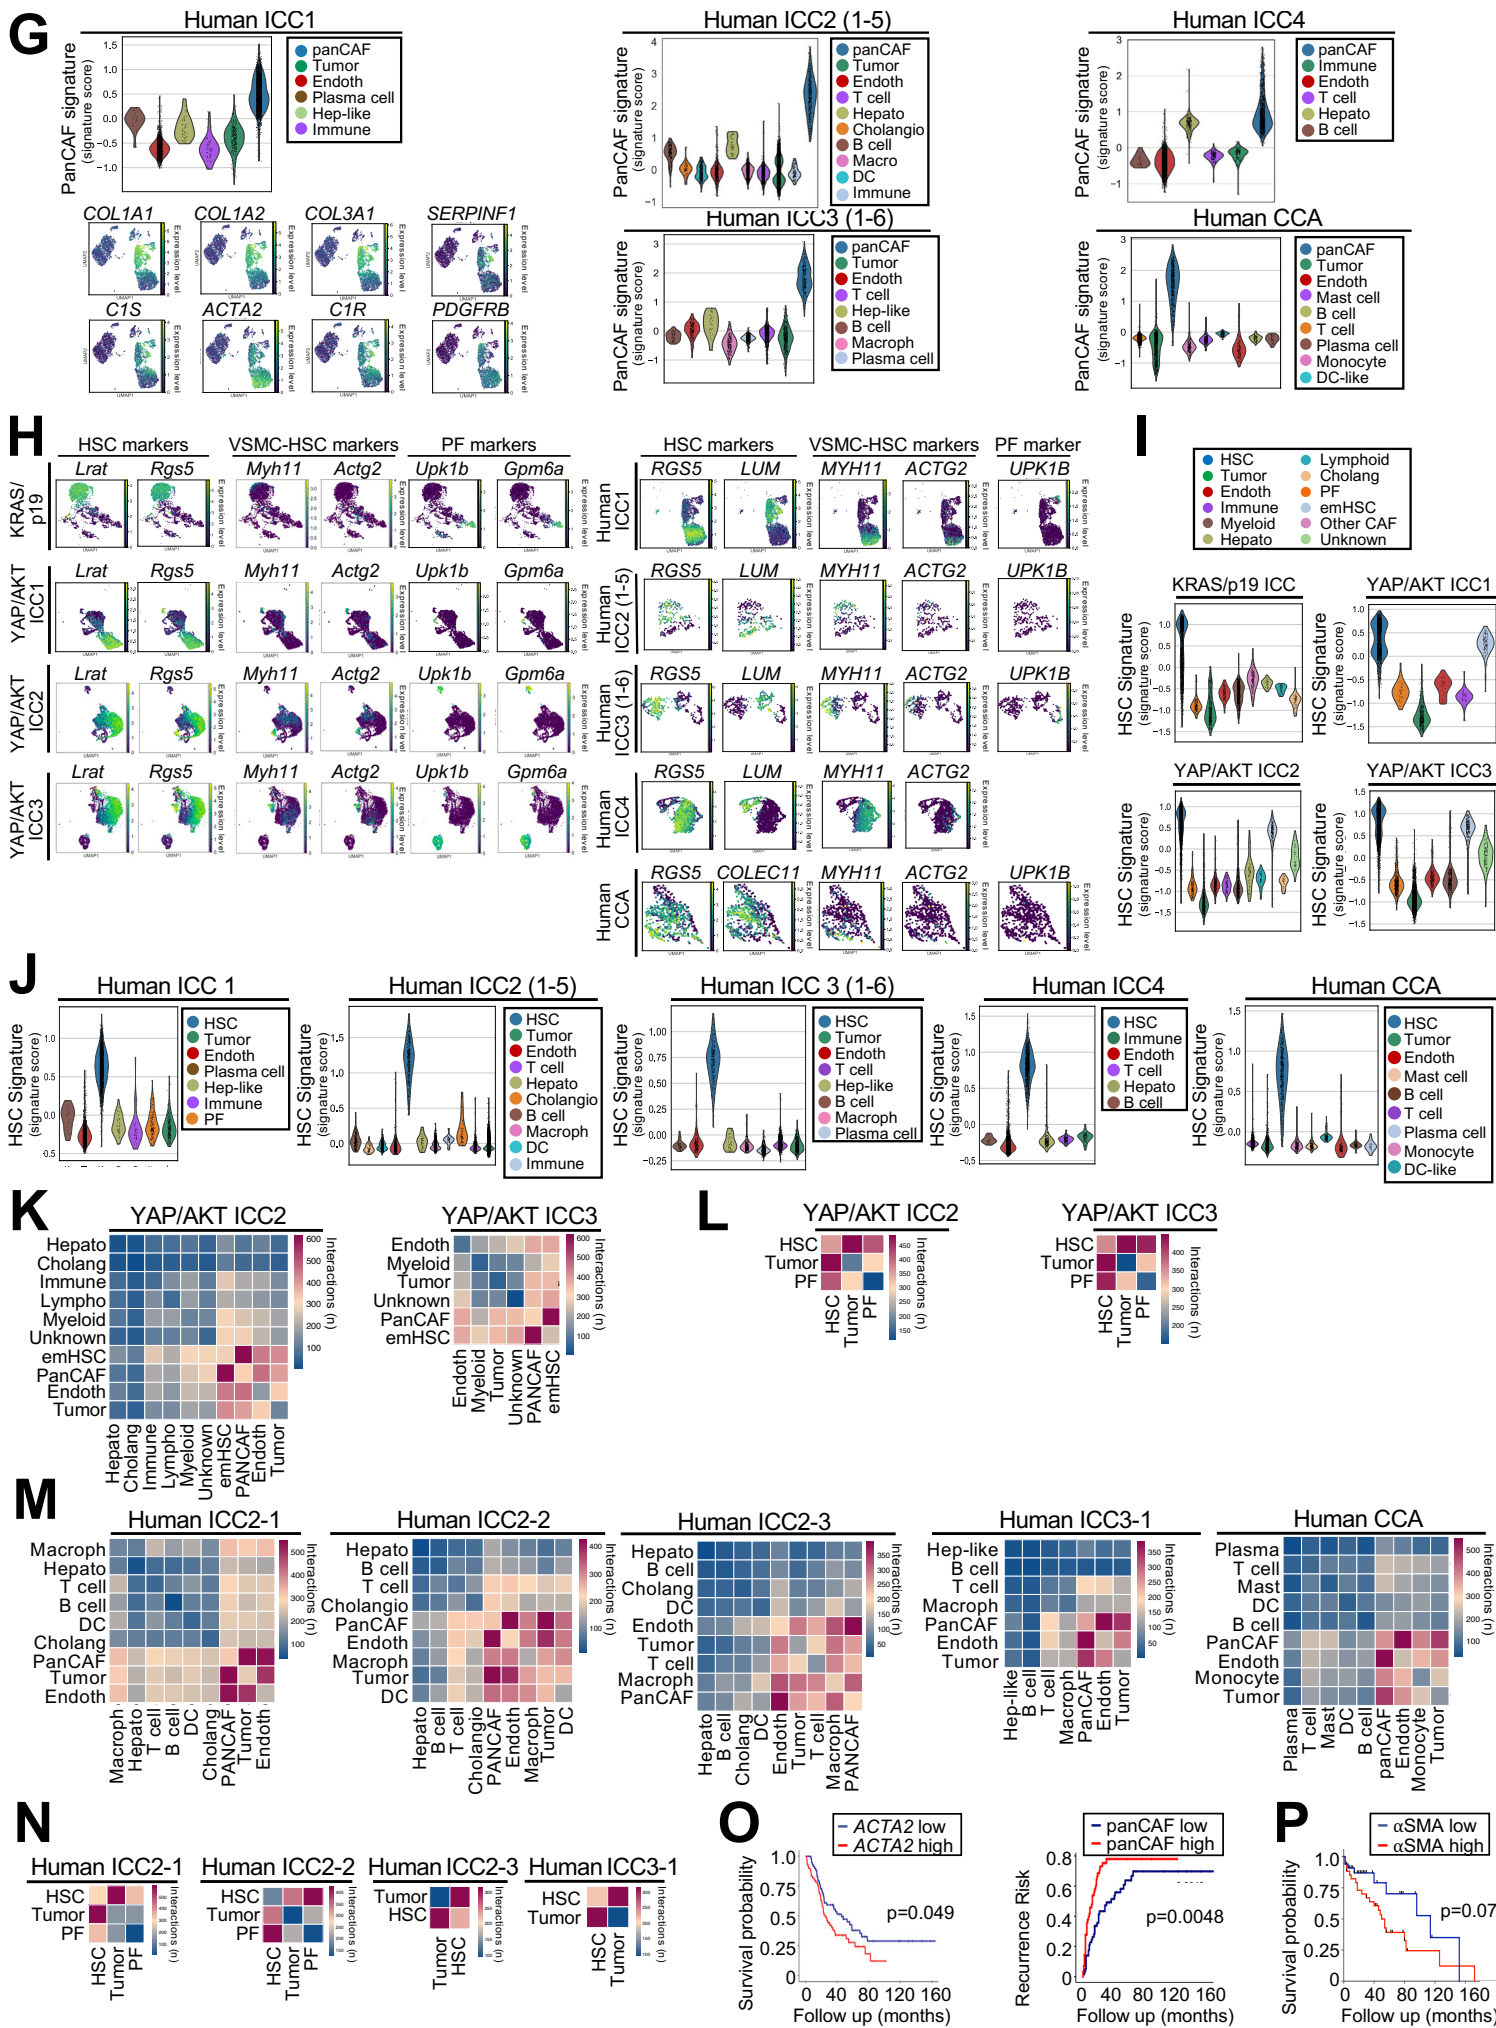

Fig.S1

**Figure S1 (Related to Figure 1) | CAF origin and interactions with tumor cells in murine and human ICC.** (A,B) Representative images of confocal microscopy showing co-localization of *Lrat*-Cre-induced TdTom with CAF markers *Colla1*-GFP (A) or  $\alpha$ SMA (B) in KRAS/p19-, YAP/AKT-, FBXW7 $\Delta$ F/AKT-, NICD/AKT-induced ICC (n=3 per model) in *Lrat*-Cre<sup>+</sup> TdTom<sup>+</sup> *Colla1*-GFP<sup>+</sup> mice. Scale bars, 50  $\mu$ m. (C) UMAPs of scRNA-seq showing all detected cell populations in the indicated samples. (D) Violin plots of scRNA-seq showing the PF signature score in the indicated samples; the width of each violin plot indicates the kernel density of the expression values. (E) UMAPs of scRNA-seq showing all detected cell populations and the normalized expression levels of indicated genes. (F,G) Violin plots showing the panCAF signature score in the indicated samples and UMAPs showing the normalized expression levels of indicated genes in (F) mouse ICC models (n=4) and in (G) human ICC (n=4) and human CCA (n=1). (H) UMAPs of scRNA-seq showing the normalized expression levels of HSC-CAF, VSMC-HSC and PF-CAF markers within panCAF in the indicated samples. (I,J) Violin plots of scRNA-seq showing the HSC signature score in (I) mouse ICC (n=4) and in (J) human ICC (n=4) and human CCA (n=1); the width of each violin plot indicates the kernel density of the expression values. (K-N) Heatmaps of scRNA-seq showing number of ligand-receptor interactions between (K,M) all cell populations and between (L,N) HSC-CAF, PF-CAF and tumor cells detected by CellphoneDB in the indicated YAP/AKT-induced ICC (n=2), human ICC (n=4) and human CCA (n=1). (O) Overall survival in 119 ICC patients with low (n=59) and high (n=60) *ACTA2* mRNA expression and recurrence risk in 113 ICC patients with low (n=56) and high (n=57) panCAF signature (Sia et al. cohort). (P) Overall survival in CCA patients with low (n=37) or high (n=40) expression of  $\alpha$ SMA (Riener et al. TMA cohort).

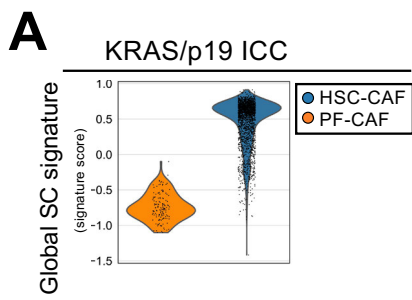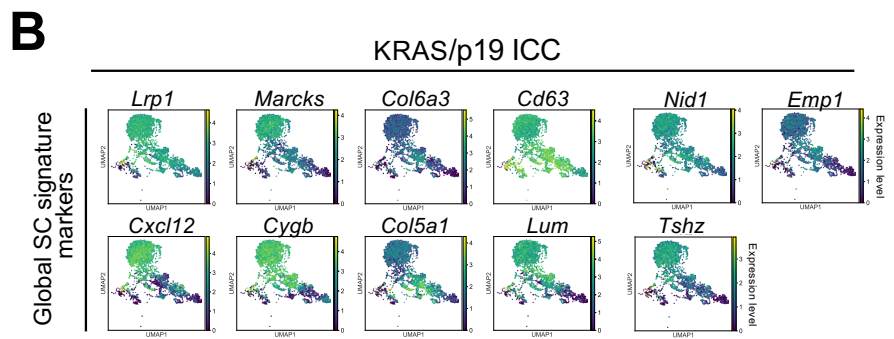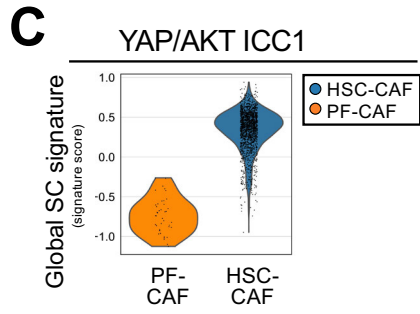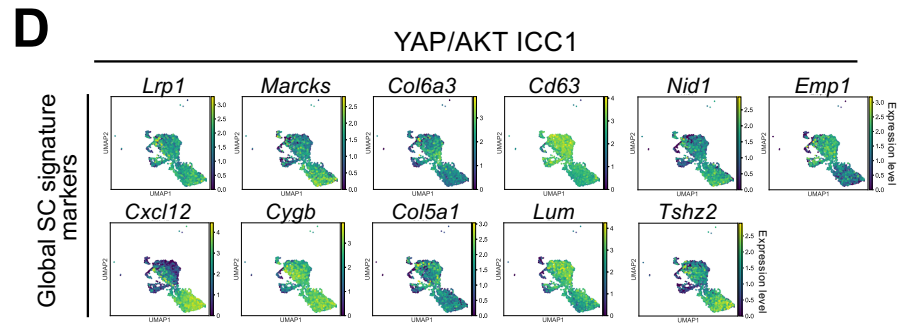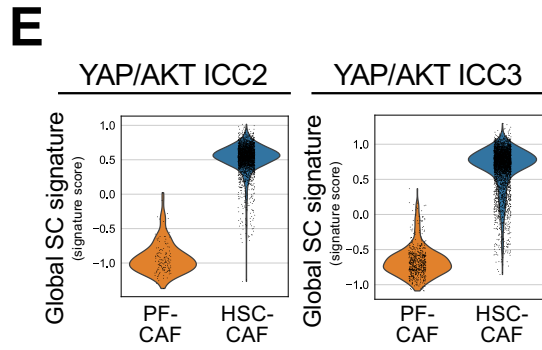

**Figure S2 (Related to Figure 2) | Comparison of CAF from ICC and PDAC by global stellate cell and portal fibroblast signatures by single cell RNA-sequencing.** (A) Violin plot showing the global SC signature in KRAS/p19-induced ICC (n=1). The width of each violin plot indicates the kernel density of the expression values. (B) UMAPs showing the normalized expression levels of the global stellate cell (global SC) signature markers in KRAS/p19 ICC. (C,E) Violin plot showing the global SC signature relative to randomly selected genes in YAP/AKT-induced ICC (n=3). The width of each violin plot indicates the kernel density of the expression values. (D) UMAPs showing the normalized expression levels of the global stellate cell (global SC) signature markers in YAP/AKT ICC (n=1).

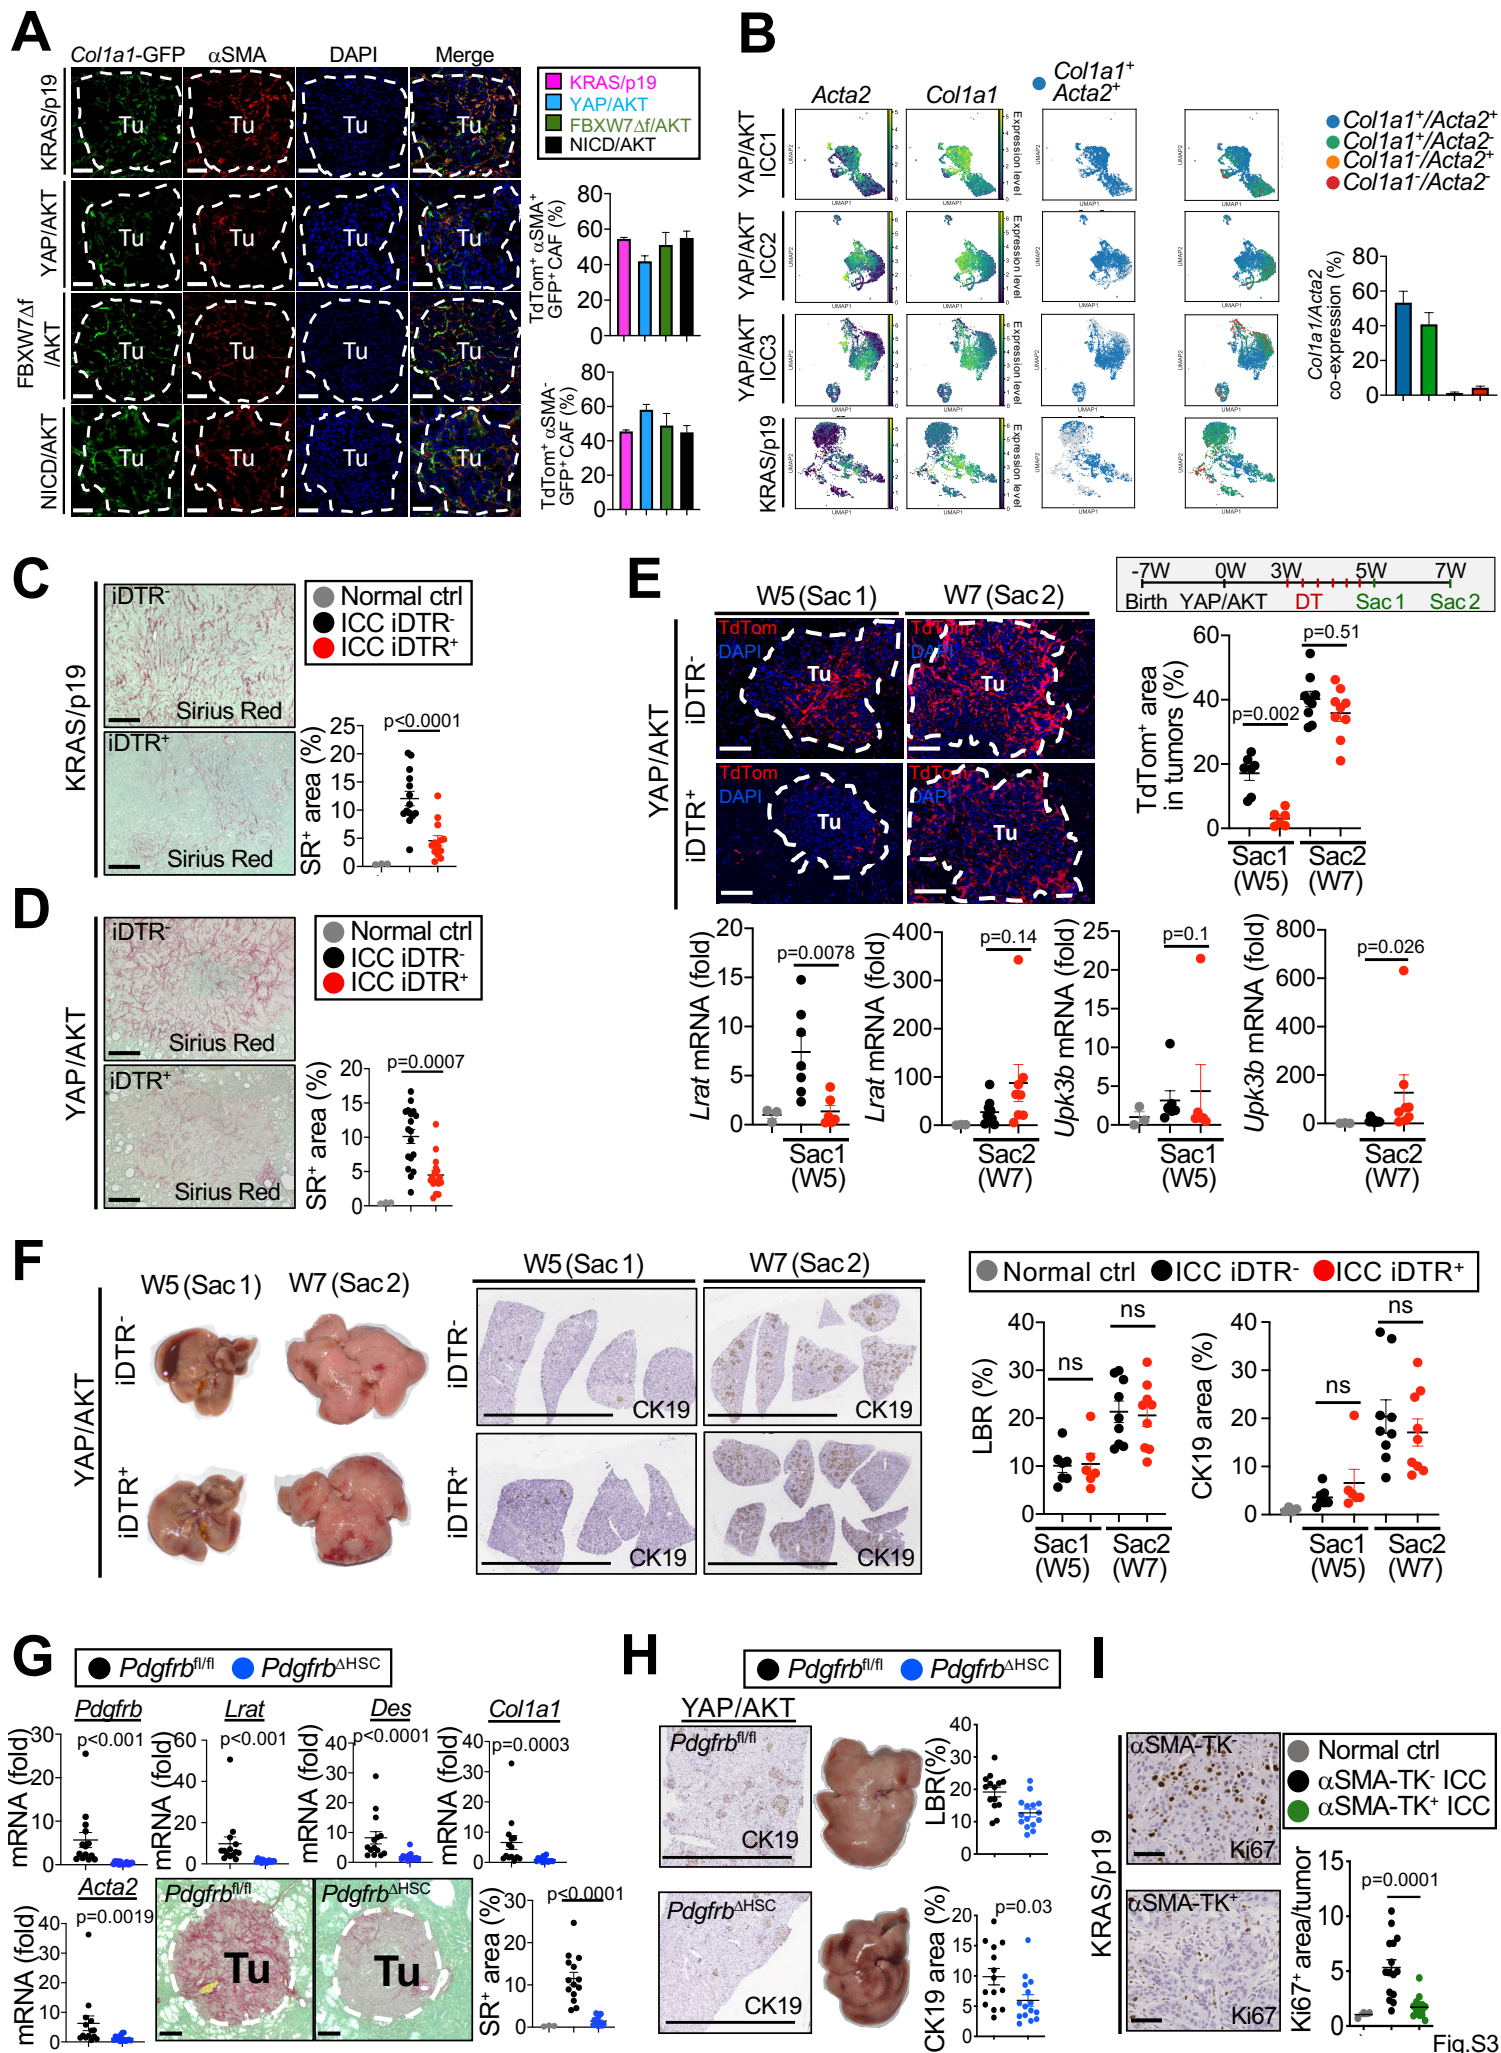

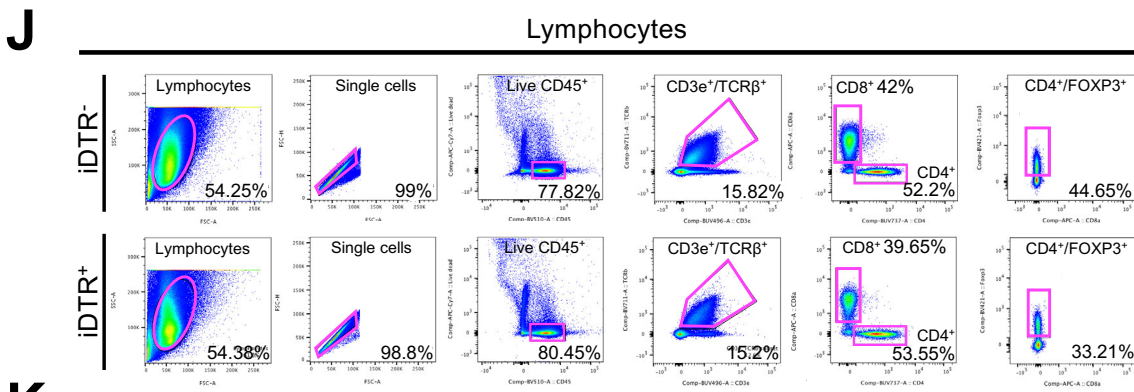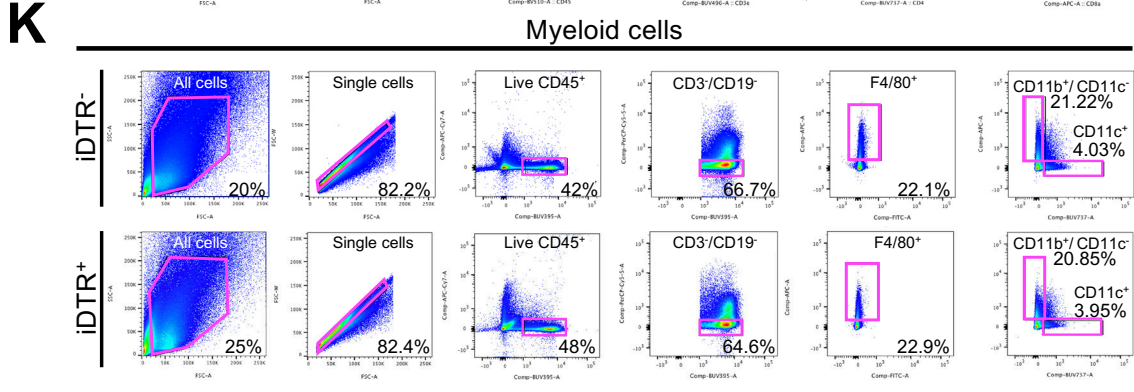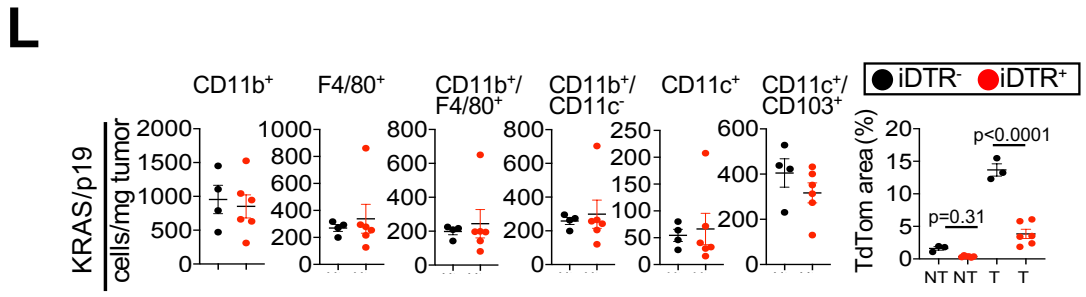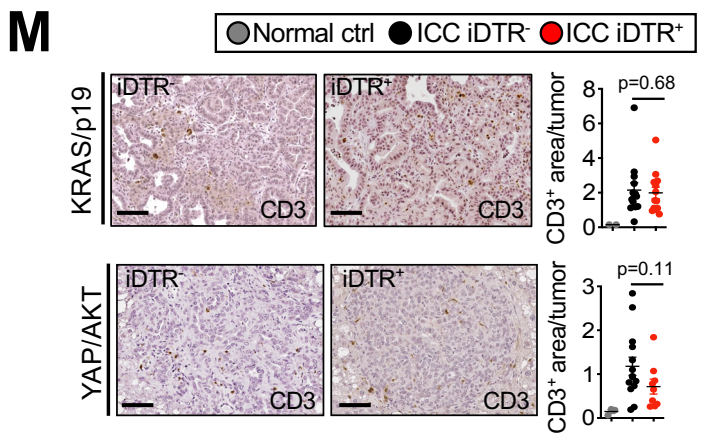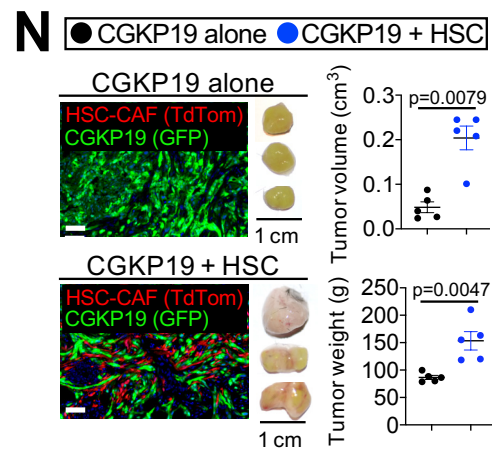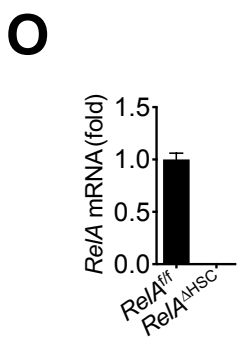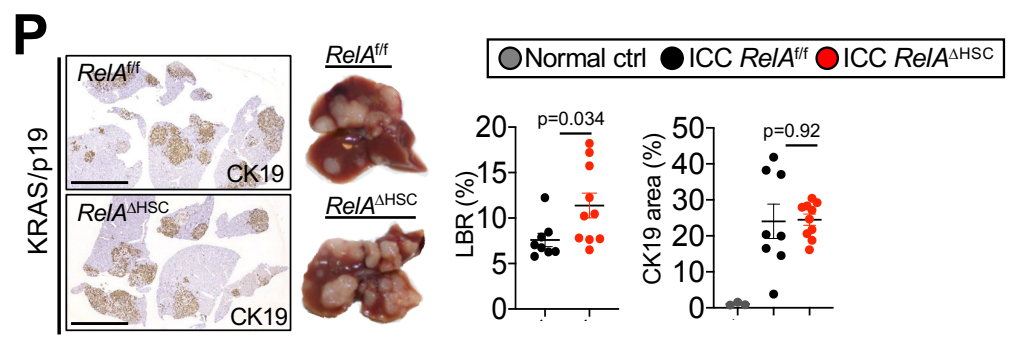

Fig.S3



**Figure S3 (Related to Figure 3) | CAF promote ICC.** (A) Representative images of confocal microscopy and quantifications showing co-localization of *Colla1*-GFP and  $\alpha$ SMA in KRAS/p19-, YAP/AKT-, FBXW7 $\Delta$ F/AKT-, NICD/AKT-induced ICC (n=3 per model) in *Lrat*-Cre<sup>+</sup> TdTom<sup>+</sup> *Colla1*-GFP<sup>+</sup> mice. Scale bars, 50  $\mu$ m. (B) UMAPs of scRNA-seq showing the normalized expression levels of indicated genes and populations and quantifications of *Colla1* and *Acta2* in KRAS/p19- (n=1) and YAP/AKT-induced ICC (n=3). (C,D) HSC-derived CAF were depleted by injecting diphtheria toxin 6 times (3x/week) in *Lrat*-Cre<sup>+</sup>, TdTom<sup>+</sup>, iDTR<sup>+</sup> or *Lrat*-Cre<sup>+</sup>, TdTom<sup>+</sup>, iDTR<sup>-</sup> littermates from week 5 to 7 after tumor induction (late depletion) and HSC depletion was confirmed by sirius red staining in (C) KRAS/p19 (n=13-15 mice/group) and (D) YAP/AKT-induced ICC (n=11-16 iDTR<sup>-</sup> mice/group). Scale bar 100  $\mu$ m. (E-F) For early HSC-derived CAF depletion, *Lrat*-Cre<sup>+</sup> TdTom<sup>+</sup> iDTR<sup>+</sup> mice and *Lrat*-Cre<sup>+</sup> TdTom<sup>+</sup> iDTR<sup>-</sup> littermate controls were injected 6 times with DT (3x/week) starting 3 weeks after the plasmid injection. (E) HSC-derived CAF depletion and repopulation by HSC-CAF or PF-CAF were determined by measuring the TdTom<sup>+</sup> area and *Lrat* (HSC marker) as well as *Upk3b* (PF marker) mRNA expression in YAP/AKT-induced ICC after the last DT injection (sac1, n=6-7 mice per group) or 2 weeks later (sac2, n=9 mice per group); (F) representative images of whole livers, liver body ratio (LBR), IHC and CK19<sup>+</sup> quantifications from above groups. Scale bars 1 cm. (G-H) *Pdgfr $\beta$* , *Lrat*, *Des*, *Colla1*, *Acta2* mRNA expression and representative images of sirius red and quantifications in *Pdgfr $\beta$* <sup>f/f</sup> (n=14) and *Pdgfr $\beta$*  <sup>$\Delta$ HSC</sup> (n=15) mice in YAP/AKT-induced ICC (G). Scale bar 100  $\mu$ m. Representative images of livers, CK19 IHC as well as quantification of LBR and CK19<sup>+</sup> area from above groups (H). Scale bars 1 cm. (I) Representative micrographs and quantifications of Ki67 IHC from KRAS/p19-induced ICC in  $\alpha$ SMA-TK mice (n=15 mice/group). Scale bars 100  $\mu$ m. (J,K) Representative gating strategy in the tumors of KRAS/p19-induced ICC, iDTR<sup>-</sup> (n=4) and iDTR<sup>+</sup> (n=6) mice for (J) lymphoid and (K) myeloid subsets. (L) Flow cytometric analysis of CD11b<sup>+</sup>, F4/80<sup>+</sup>, CD11b<sup>+</sup>/F4/80<sup>+</sup>, CD11b<sup>+</sup>/CD11c<sup>-</sup>, CD11c<sup>+</sup>, CD11c<sup>+</sup>/CD103<sup>+</sup> subsets in the tumors from KRAS/p19-induced ICC as well as confirmation of depletion via TdTom<sup>+</sup> area in *Lrat*-Cre<sup>+</sup>TdTom<sup>+</sup> iDTR<sup>-</sup> (n=4) and *Lrat*-Cre<sup>+</sup>TdTom<sup>+</sup> iDTR<sup>+</sup> (n=6) mice. (M) Representative micrographs and quantifications of CD3 IHC from KRAS/p19-induced ICC (n=14 iDTR<sup>-</sup> mice, n=13 iDTR<sup>+</sup> mice) and YAP/AKT-induced ICC (n=14 iDTR<sup>-</sup> mice, n=9 iDTR<sup>+</sup> mice). Scale bars 100  $\mu$ m. (N) Subcutaneous co-injections of CGKP19 KRAS/p19 ICC-derived cells alone or with HSC in *Rag2*KO mice. (O) *RelA* mRNA expression in HSC from *RelA*<sup>f/f</sup> (n=2) and *RelA* <sup>$\Delta$ HSC</sup> (n=2). (P) Representative images of CK19 IHC, livers, LBR and CK19<sup>+</sup> area from *RelA*<sup>f/f</sup> (n=8) and *RelA* <sup>$\Delta$ HSC</sup> (n=10) from KRAS/p19-induced ICC. For panels A-I, L-P data are shown as mean  $\pm$  SEM, and statistical significance was determined using two-sided unpaired T-test (G,H,L,N) or Mann-Whitney (F,H,L,N,P) for groups of two; and by one-way ANOVA followed by Sidak's posthoc test (C,E,F,M,P) or Kruskal-Wallis test with Dunn's posthoc test (A,B,D,G,I) for groups of three.

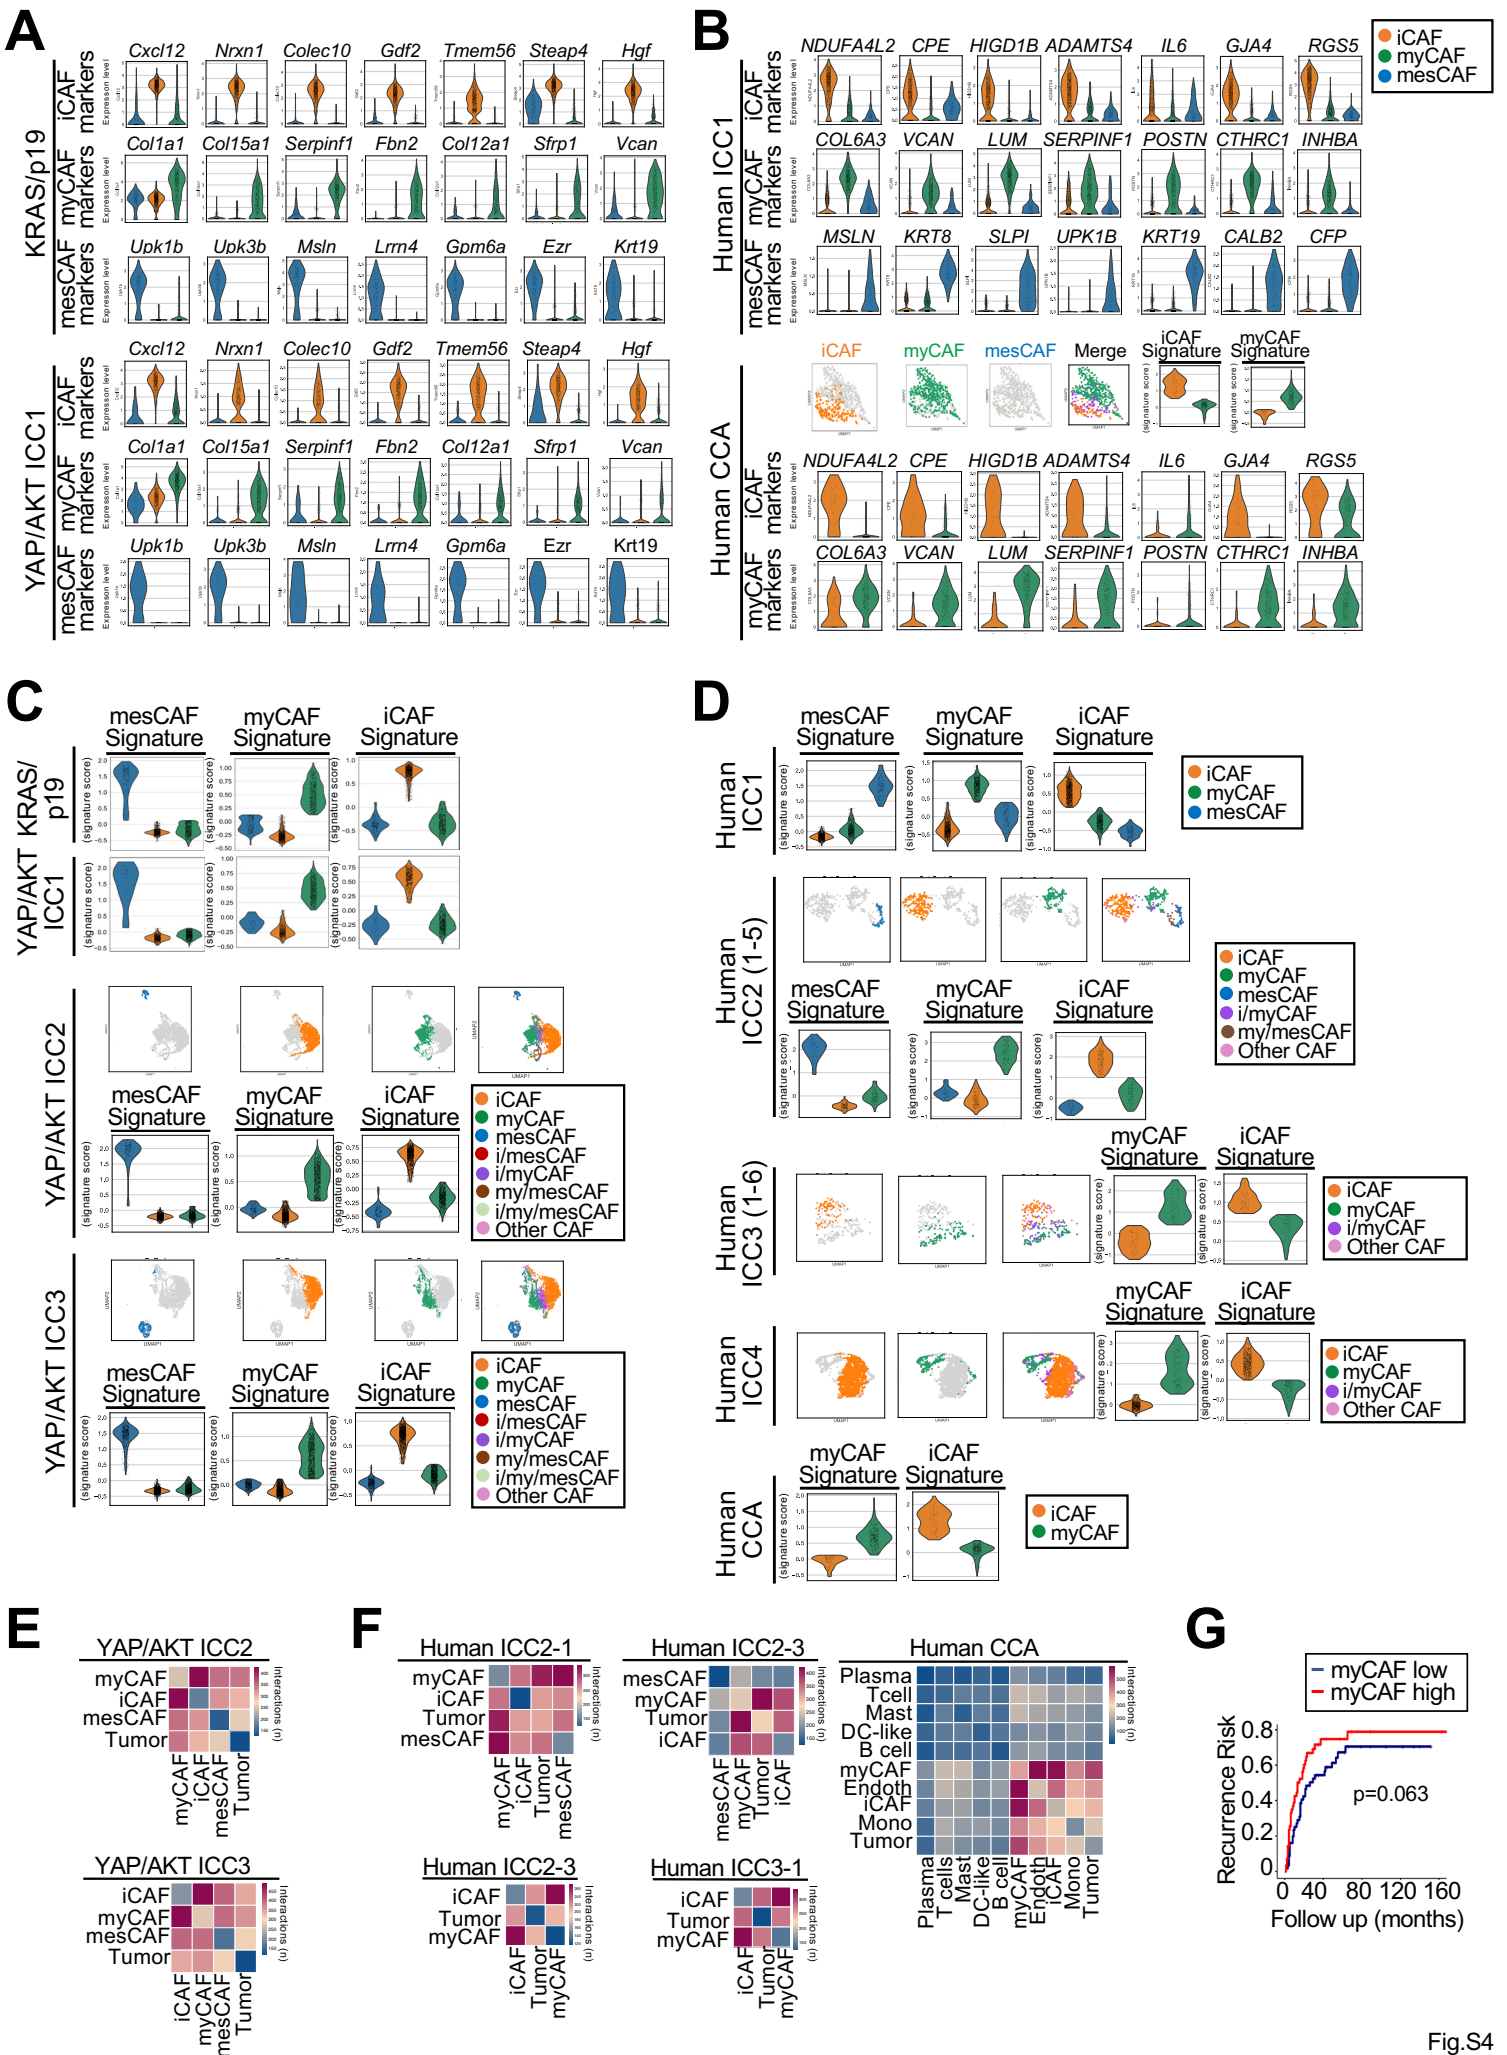

Fig.S4

**Figure S4 (Related to Figure 4) | Single cell RNA-sequencing of CAF subpopulations in murine and human ICC.** (A,B) Violin plots showing the normalized expression levels of the top genes from iCAF, myCAF and mesCAF signatures in (A) KRAS/p19- , YAP/AKT-induced ICC and (B) human ICC and CCA in one representative sample each. (C,D) Violin plots showing the iCAF, myCAF and mesCAF signature scores in the indicated (C) KRAS/p19- induced ICC, YAP/AKT-induced ICC, (D) human ICC and human CCA samples. The width of each violin plot indicates the kernel density of the expression values. (E,F) Heatmaps showing number of ligand–receptor interactions between iCAF, myCAF, mesCAF and tumor cells in the indicated (E) YAP/AKT-induced ICC, (F) human ICC and human CCA samples, analyzed by CellPhone DB. (G) Recurrence risk in 113 ICC patients with low (n=56) and high (n=57) myCAF signature (Sia et al. cohort).

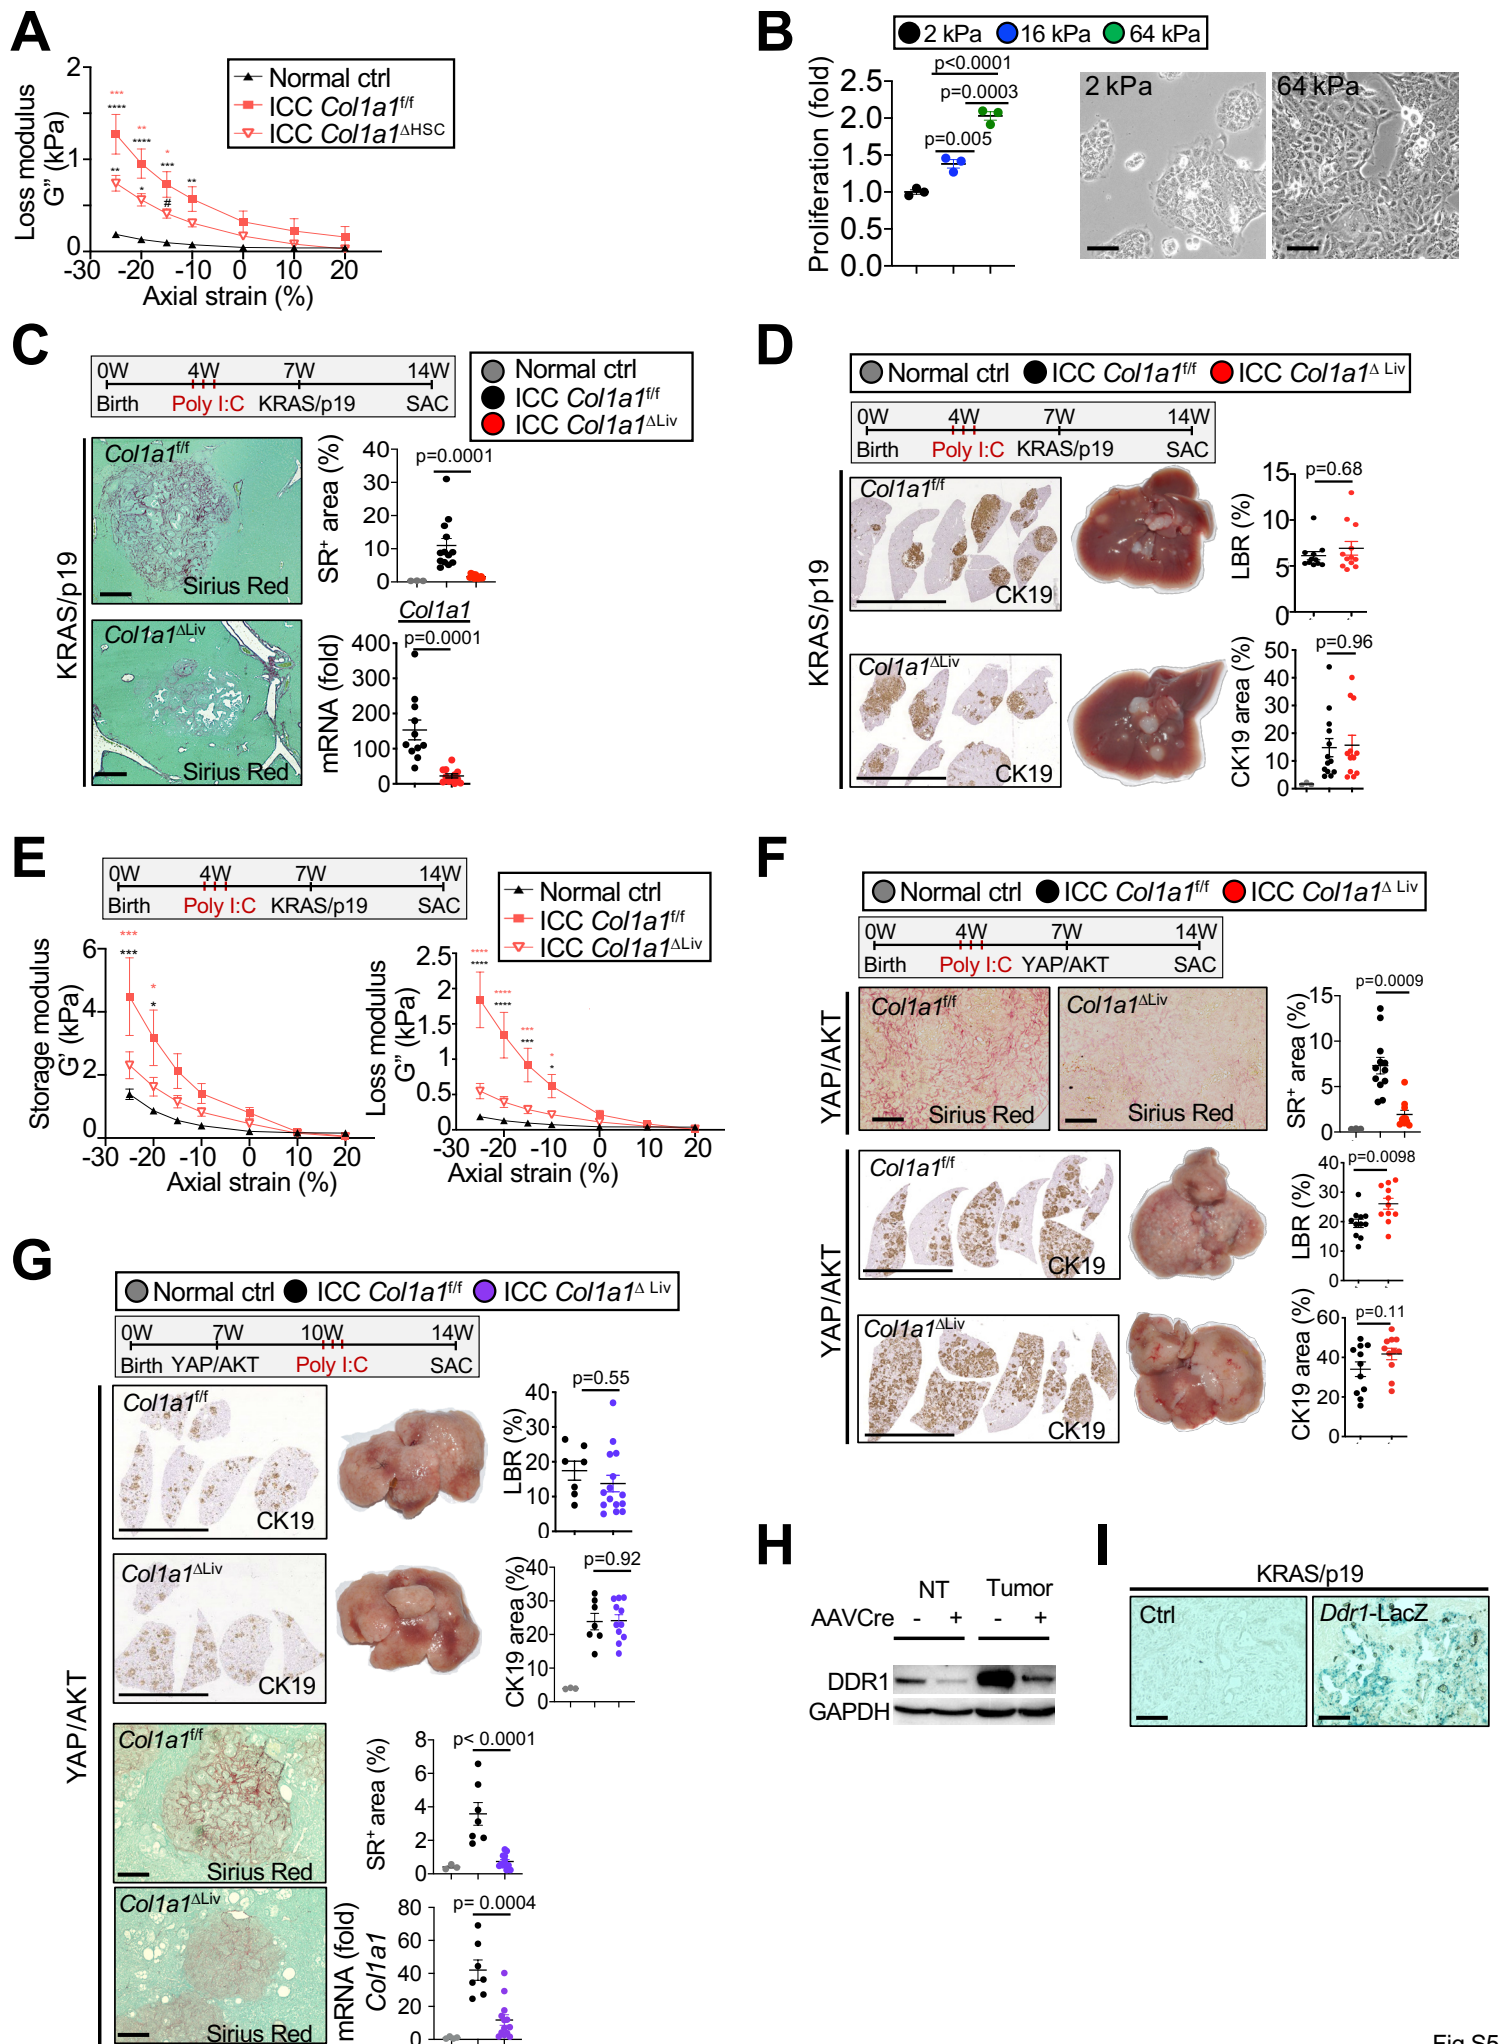

**Figure S5 (Related to Figure 5) | CAF promote tumor growth independently of type I collagen.** (A) Loss modulus  $G''$  (a measure of viscosity), was determined for tumors from  $Collal^{f/f}$  (n=3) and  $Collal^{\Delta HSC}$  (n=4) in a KRAS/p19-induced ICC and in control livers (n=2) by shear rheometry. Curves are mean  $\pm$  SEM. Using 2-way ANOVA: \* $p \leq 0.05$ , \*\* $p \leq 0.01$ , \*\*\*\* $p \leq 0.0001$ , # $0.05 < p \leq 0.10$  vs ctrl (black) or vs  $Collal^{\Delta HSC}$  (red). (B) Proliferation assessed by PicoGreen in HuCCT-1 plated on 2kPa, 16 kPa and 64 kPa plates (n=3 each group) and representative pictures of HuCCT-1 plated on 2kPa and 64 kPa plates. (C-E) Mx1-Cre activation for the deletion of *Collal* was induced by 3 i.p. injections of poly(I:C) before tumor induction starting when mice were 4 weeks old. (C) Representative images and quantification of sirius red staining and tumor *Collal* mRNA expression in  $Collal^{f/f}$  (n=13) and  $Collal^{\Delta Liv}$  (n=12) in KRAS/p19-induced ICC. Scale bars 100  $\mu$ m. (D) Representative images of CK19 IHC, livers, LBR and CK19<sup>+</sup> area from KRAS/p19-induced ICC for  $Collal^{f/f}$  (n= 13) and  $Collal^{\Delta Liv}$  (n=12) mice. Scale bars 1 cm. (E) Storage modulus  $G'$  (a measure of elasticity) and loss modulus  $G''$  (a measure of viscosity), were determined for tumors from  $Collal^{f/f}$  (n=3) and  $Collal^{\Delta Liv}$  (n=6) in KRAS/p19 ICC or control liver (n=2) by shear rheometry. Curves are mean  $\pm$  SEM. Using 2-way ANOVA: \* $p \leq 0.05$ , \*\* $p \leq 0.01$ , \*\*\*\* $p \leq 0.0001$ , # $0.05 < p \leq 0.10$  vs ctrl (black) or vs  $Collal^{\Delta Liv}$  (red). (F) Representative images and quantifications of sirius red staining, livers, LBR and the CK19<sup>+</sup> area in  $Collal^{f/f}$  (n=11) and  $Collal^{\Delta Liv}$  (n=11) mice from YAP/AKT-induced ICC. Scale bars 1 cm. (G) Mx1-Cre activation for the deletion of *Collal* was induced by 3 i.p. injections of poly(I:C) starting 3 weeks after tumor induction. Representative images of sirius red staining and livers, LBR, *Collal* mRNA expression and the CK19 and sirius red-positive area in  $Collal^{f/f}$  (n=7) and  $Collal^{\Delta Liv}$  (n=11) mice from YAP/AKT-induced ICC. Scale bars 1 cm. (H) DDR1 western blot in *Ddr1*<sup>f/f</sup> NT (n=1) and T (n=1) and (I) representative XGAL staining in *Ddr1*-LacZ reporter (n=1) and wt littermate (n=1) mice in KRAS/p19-induced ICC. Data are shown as mean  $\pm$  SEM, and statistical significance was determined by two-sided unpaired T-test (D,F) or Mann-Whitney (E) for groups of two; and by 2-way ANOVA (A,E) or one-way ANOVA (B,G) or Kruskal-Wallis test with Dunn's posthoc test (C,D) for groups of three.

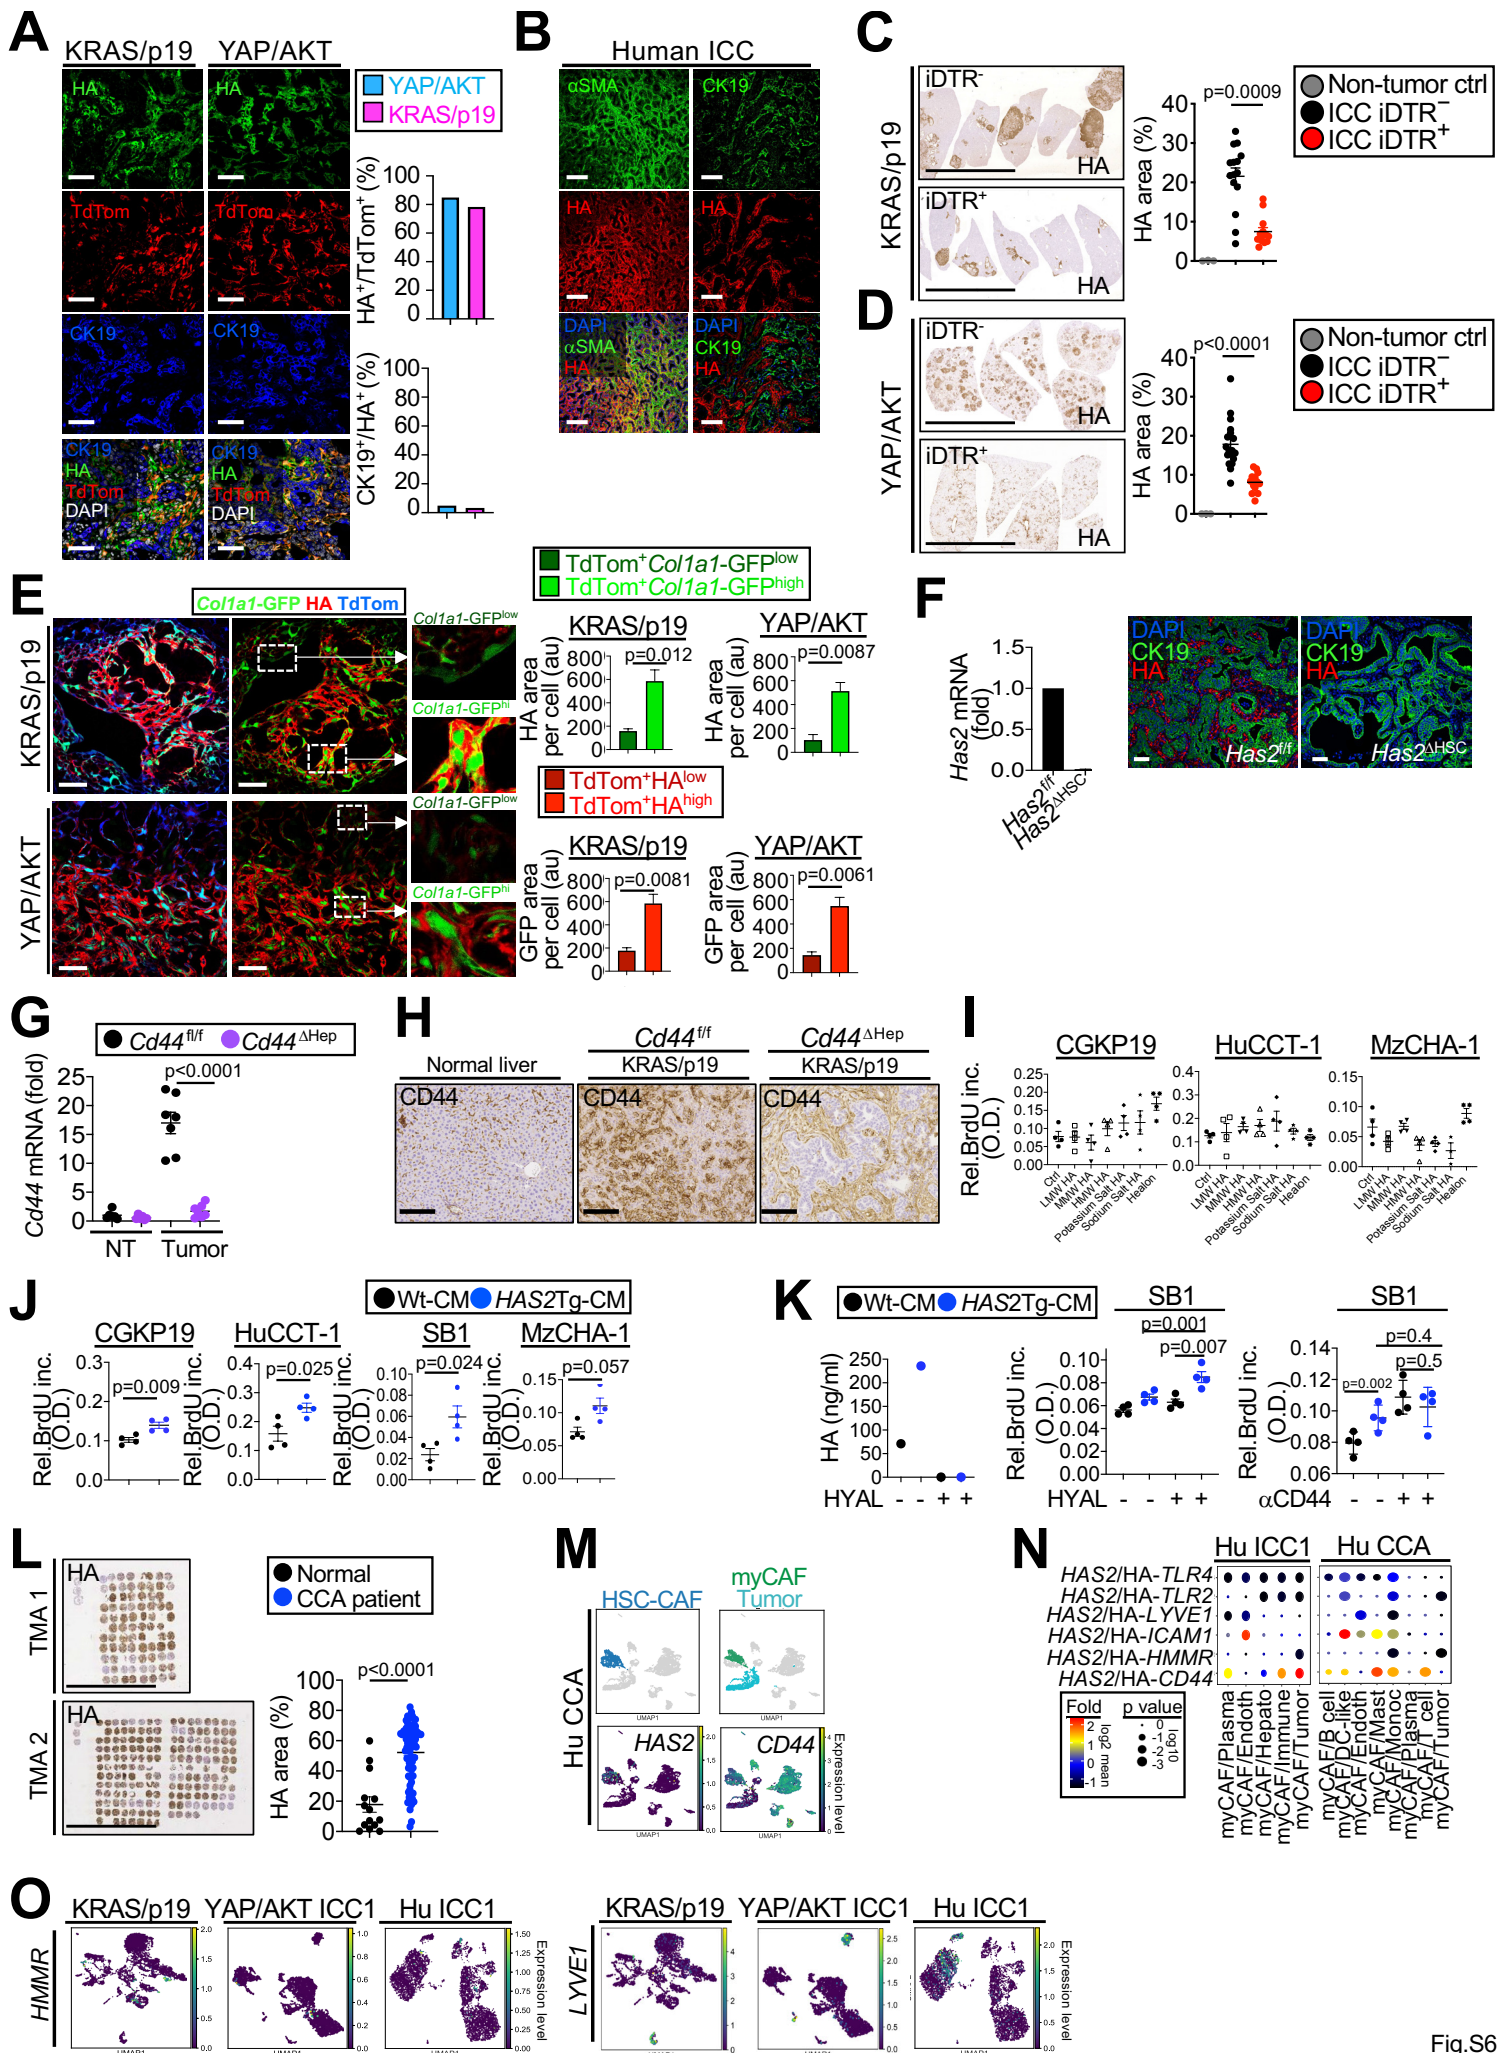

Fig.S6

**Figure S6 (Related to Figure 6) | myCAF-derived HAS2 sustain tumor growth in ICC.** (A) Representative micrograph and quantifications of confocal microscopy show co-localization of *Lrat*-Cre-induced TdTom (HSC derived-CAF) with HA and absent co-localization with CK19 in KRAS/p19- (n=1) and YAP/AKT- (n=1) ICC. (B) Confocal microscopy in human ICC (n=1) showed co-localization of HA with  $\alpha$ SMA but not with CK19. Scale bars, 50  $\mu$ m. (C,D) Representative micrographs of HA IHC and quantification in CAF-depleted mice from (C) KRAS/p19-ICC (n=15 iDTR<sup>-</sup>, n=13 iDTR<sup>+</sup> mice) and (D) YAP/AKT-induced ICC (n=16 iDTR<sup>-</sup>, n=11, iDTR<sup>+</sup> mice). Scale bars 1 cm. (E) Representative micrograph and quantifications of confocal microscopy show high expression of myCAF HA in cells with high expression of myCAF marker *Colla1*-GFP and low expression of myCAF HA in cells with low expression of myCAF marker *Colla1*-GFP, in KRAS/p19- and YAP/AKT-induced ICC (n=3 tumors per group). Scale bars, 50  $\mu$ m. (F) *Has2* mRNA expression in HSC isolated from *Has2*<sup>f/f</sup> (n=1) and *Has2*<sup>ΔHSC</sup> (n=2) and representative confocal microscopy showing absent HA in *Has2*<sup>ΔHSC</sup> mice. Scale bars, 50  $\mu$ m. (G) *Cd44* mRNA expression in tumor (T) (n=6 per group) and non-tumor (NT) (n=7 per group) tissue from *Cd44*<sup>f/f</sup> and *Cd44*<sup>ΔHep</sup> mice. (H) Representative micrographs of CD44 IHC in normal liver and tumor area in KRAS/p19-induced ICC in *Cd44*<sup>f/f</sup> and *Cd44*<sup>ΔHep</sup> mice. (I) BrdU incorporation assay in mouse (CGKP19) and human (HuCCT1 and MzCHA) tumor cells treated with different types of HA. (J) BrdU incorporation assay in human and mouse tumor cells treated with conditioned medium (CM) from *HAS2*-Tg and littermate wt mice (n=4/group). (K) HA content in the CM from *HAS2*-Tg and littermate control wt mice by ELISA in presence or absence of hyaluronidase (HYAL) (n=1 per condition, left panel) and BrdU incorporation assay in SB1 cells treated with CM from *HAS2*-Tg or littermate wt mice in the presence or absence of HYAL or after pre-treatment with CD44 antibody or IgG control (n=4 per condition, middle and right panel). (L) Representative micrographs and quantifications of HA-stained area of human CCA TMAs (n=19 ICC and n=58 ECC) and normal liver (n=14). Scale bars 1 cm. (M) UMAPs showing the normalized expression levels of *HAS2* and *CD44* in human CCA (n=1). (N) Representative CellphoneDB heatmap showing interactions of *HAS2*-expressing myCAF with HA-receptor expressing cells in human ICC and in CCA. (O) UMAPs showing the normalized expression levels of *HMMR* and *LYVE1* in KRAS/p19-, YAP/AKT-induced ICC and in human ICC. For panels C-E, G, I-L; data are shown as mean  $\pm$  SEM, statistical significance was determined by two-sided unpaired T-test (J) or Mann-Whitney (J, L) groups of two; and by one-way ANOVA followed by Sidak's posthoc test (D, E, K, G, I) or Kruskal-Wallis test with Dunn's posthoc test (C, I) groups of three.

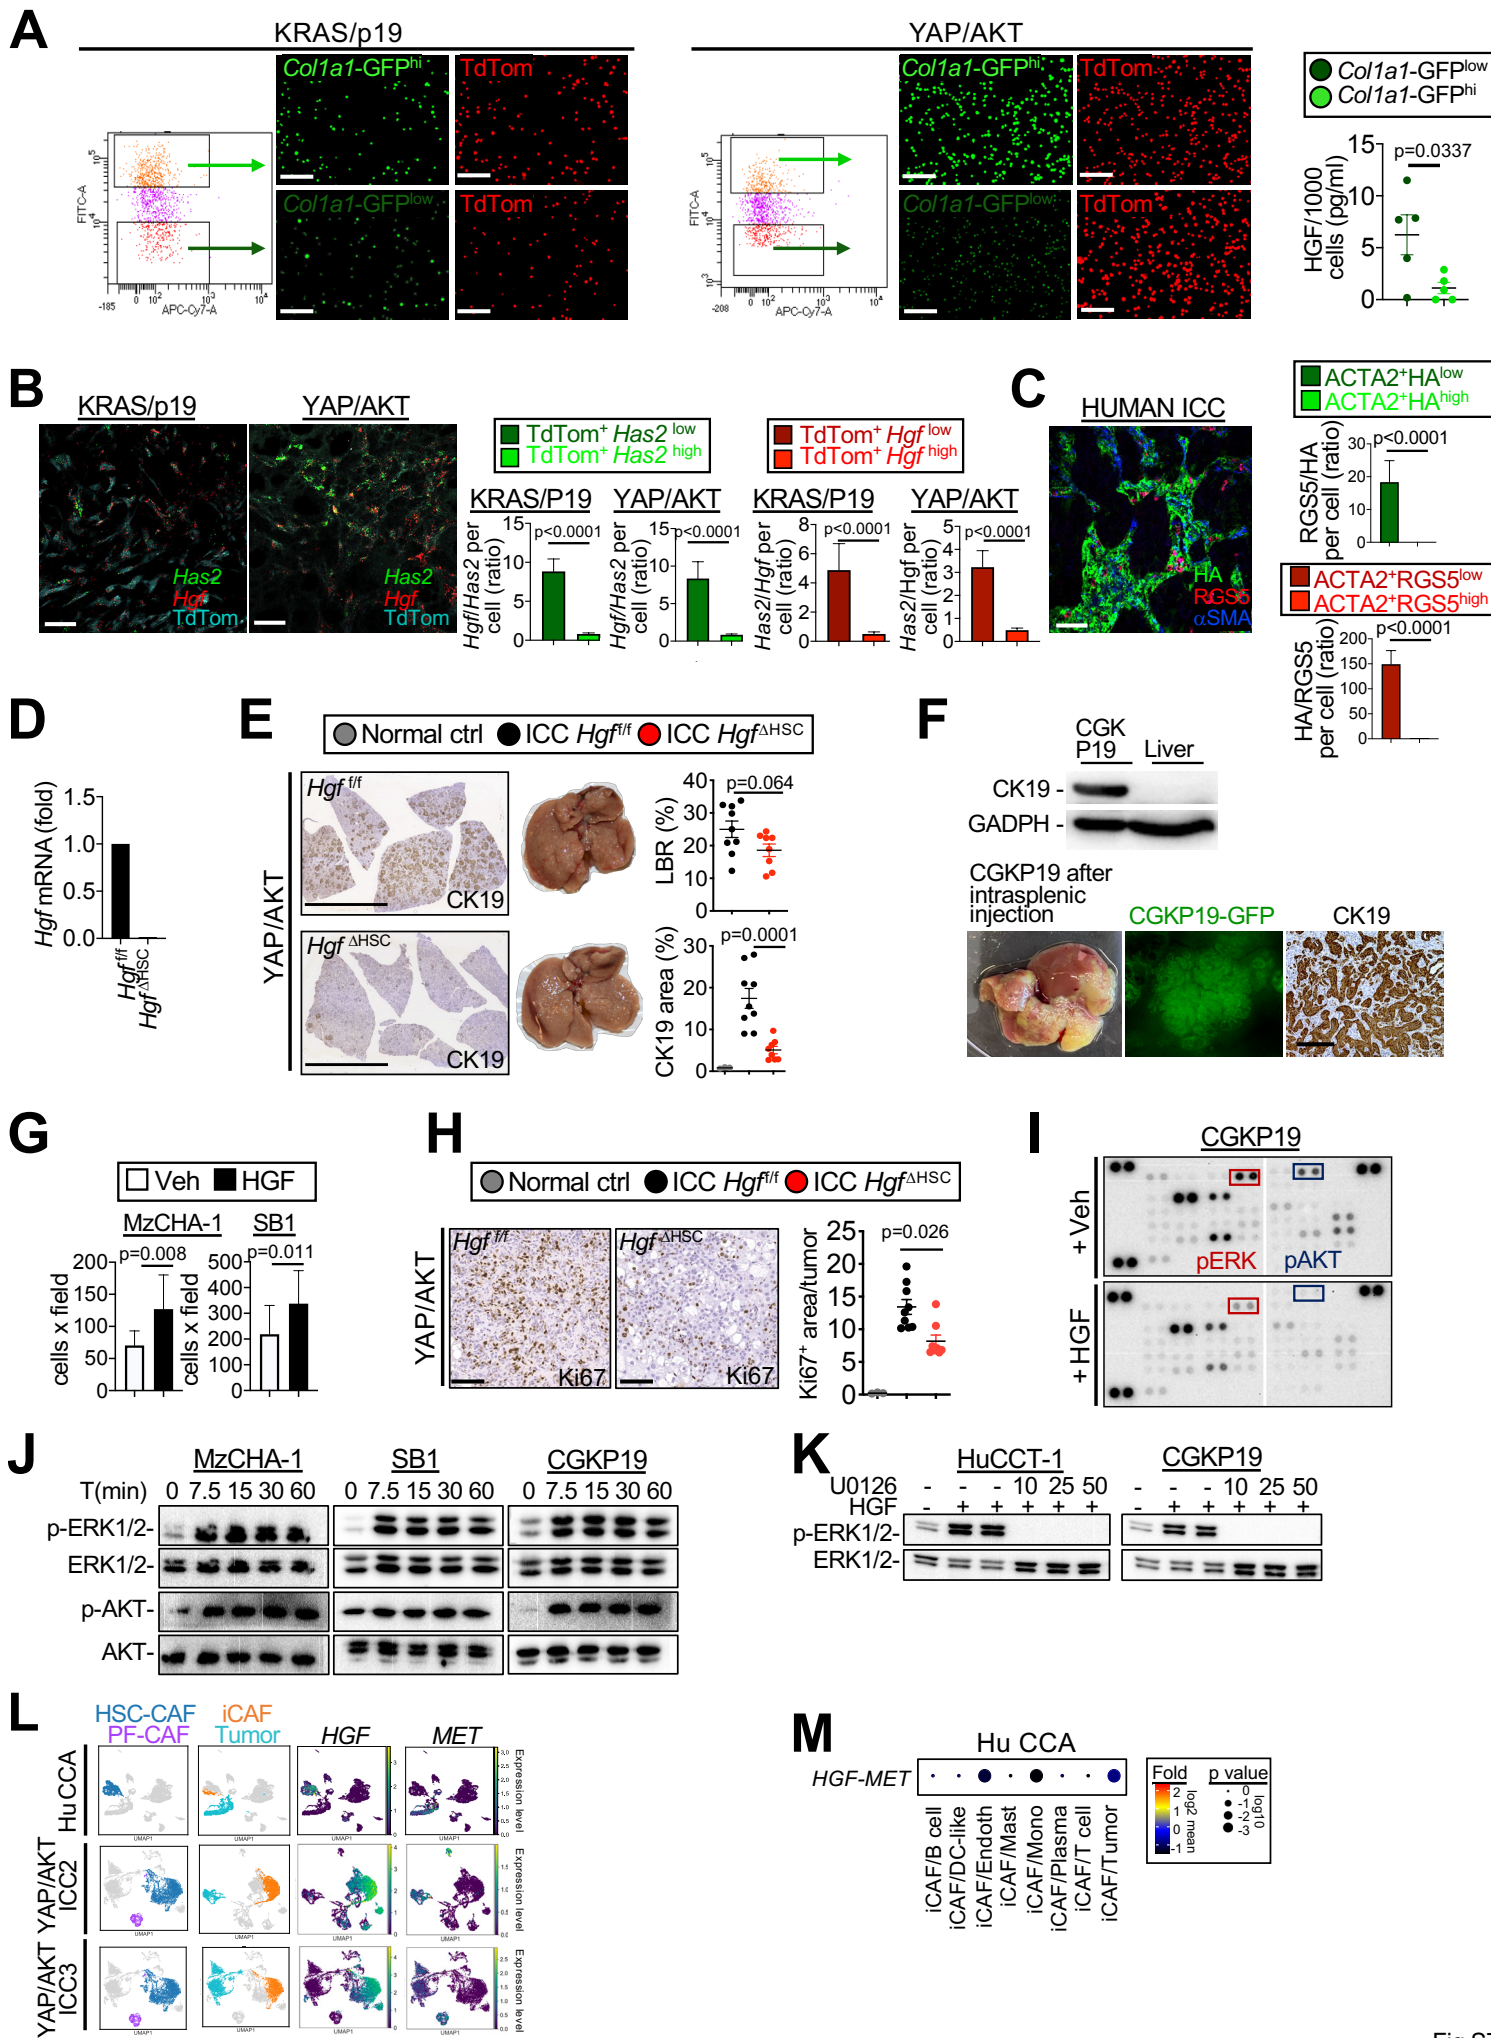

Fig.S7



**Figure S7 (Related to Figure 7) | iCAF-derived HGF promotes ICC growth.** (A) Representative gating strategy and pictures showing the *Lrat-Cre<sup>+</sup>TdTom<sup>+</sup>Colla1-GFP<sup>high</sup>* (myCAF) and *Lrat-Cre<sup>+</sup>TdTom<sup>+</sup>Colla1-GFP<sup>low</sup>* (iCAF) cells sorted and freshly plated from tumors of KRAS/p19- (n=3) and YAP/AKT-induced ICC (n=2); and ELISA showing that *Lrat-Cre<sup>+</sup>TdTom<sup>+</sup>Colla1-GFP<sup>low</sup>* iCAF produce more HGF compared to the *Lrat-Cre<sup>+</sup>TdTom<sup>+</sup>Colla1-GFP<sup>high</sup>* myCAF 24 hours after plating. Scale bars, 100  $\mu$ m. (B) Confocal microscopy representative images of RNAscope showing *Has2* and *Hgf* in *Lrat-Cre<sup>+</sup>TdTom<sup>+</sup>* mice in KRAS/p19- and YAP/AKT-induced ICC. Scale bars, 50  $\mu$ m. (C) Representative fluorescent confocal microscopy image of iCAF marker RGS5 and myCAF marker HA and quantifications in human ICC (n=1). Scale bars, 50  $\mu$ m. (D) *Hgf* mRNA expression in HSC from *Hgf<sup>f/f</sup>* (n=1) and *Hgf <sup>$\Delta$ HSC</sup>* (n=2). (E) Representative images of CK19 immunohistochemistry, livers, LBR and CK19<sup>+</sup> area from *Hgf<sup>f/f</sup>* (n=9) and *Hgf <sup>$\Delta$ HSC</sup>* (n=8) livers in YAP/AKT-induced ICC. Scale bars 1 cm. (F) CK19 western blot in the CGKP19 cell line (n=1) and whole liver (n=1) and representative picture of liver, CGKP19 native fluorescence and CK19 immunohistochemistry in CGKP19 spleen-injected mouse. Scale bar 100  $\mu$ m. (G) Human MzCHA-1 and murine SB1 cell lines were treated with recombinant human or mouse HGF (25 ng/ml, n=5) or vehicle (n=5) and cell number was determined after 48h. (H) Representative micrographs of Ki67 IHC in *Hgf<sup>f/f</sup>* and *Hgf <sup>$\Delta$ HSC</sup>* in YAP/AKT-induced ICC. Scale bars 100  $\mu$ m. (I) CGKP19 cells were treated with mouse HGF, followed by phospho-kinase array. (J,K) Human (MzCHA1) and murine (SB1 and CGKP19) CCA cell lines were treated with (J) recombinant HGF (K) in the presence of MEK1/2 inhibitor U0126 or vehicle and were tested by western blot for phosphorylated and total ERK1/2. (L) UMAPs showing the normalized expression levels of *HGF* and *MET* in human CCA (n=1) and in YAP/AKT-induced ICC (n=2). (M) CellphoneDB showing interaction of *HGF*-expressing iCAF with *MET*-expressing cells in human CCA (n=1). For panels A-C,E,G,H; data are shown as mean  $\pm$  SEM, statistical significance was determined by two-sided unpaired T-test (A,E,G) or Mann-Whitney (B,C) groups of two; and by one-way ANOVA followed by Sidak's posthoc test (E) or Kruskal-Wallis test with Dunn's posthoc test (H) groups of three.

Table S1 (Related to Figure 1 and Figure S1). Description of mouse and human scRNA sequencing samples used for CAF analysis

**MOUSE SAMPLES scRNA-seq (GSE154170)**

| Sample ID    | ICC model                   | Enrichment                                             | HSC-CAF<br>PF-CAF%<br>analysis | iCAF, myCAF,<br>mesCAF%<br>analysis | CellphoneDB<br>analysis | Total CAF<br>number | HSC-CAF<br>number | PF-CAF<br>number | Non-PF,<br>non-HSC<br>other CAF<br>number | iCAF<br>number | myCAF<br>number | mesCAF<br>number | multiCAF<br>number | Non- i/my/<br>mesCAF<br>other CAF<br>number |
|--------------|-----------------------------|--------------------------------------------------------|--------------------------------|-------------------------------------|-------------------------|---------------------|-------------------|------------------|-------------------------------------------|----------------|-----------------|------------------|--------------------|---------------------------------------------|
| YAP/AKT ICC1 | YAP/AKT plasmids<br>HDTV1*  | 100% Col1a1-GFP+                                       | ✓                              | ✓                                   | ✓                       | 1830                | 1788              | 42               | none                                      | 790            | 835             | 41               | 95                 | 69                                          |
| YAP/AKT ICC2 | YAP/AKT plasmids<br>HDTV1*  | 70% Col1a1-GFP+ and 30%<br>unpurified tumor suspension | ✓                              | ✓                                   | ✓                       | 3256                | 3117              | 139              | none                                      | 1747           | 1026            | 137              | 282                | 64                                          |
| YAP/AKT ICC3 | YAP/AKT plasmids<br>HDTV1*  | 100% Col1a1-GFP+                                       | ✓                              | ✓                                   | ✓                       | 4683                | 4076              | 607              | none                                      | 2183           | 1262            | 540              | 563                | 135                                         |
| KRAS/p19     | KRAS/p19 plasmids<br>HDTV1* | 70% Col1a1-GFP+ and 30%<br>unpurified tumor suspension | ✓                              | ✓                                   | ✓                       | 2662                | 2324              | 149              | 189                                       | 1350           | 686             | 204              | 367                | 55                                          |

\*HDTV1= Hydrodynamic tail vein injection

**HUMAN SAMPLES scRNA-seq**

| Sample ID      | Source paper       | Source Sample ID                 | HSC-CAF<br>PF-CAF%<br>analysis | iCAF, myCAF,<br>mesCAF%<br>analysis | CellphoneDB<br>analysis | Total CAF<br>number | HSC-CAF<br>number | PF-CAF<br>number | Non-PF,<br>non-HSC<br>other CAF<br>number | iCAF<br>number | myCAF<br>number | mesCAF<br>number | multiCAF<br>number | Non- i/my/<br>mesCAF<br>other CAF<br>number |
|----------------|--------------------|----------------------------------|--------------------------------|-------------------------------------|-------------------------|---------------------|-------------------|------------------|-------------------------------------------|----------------|-----------------|------------------|--------------------|---------------------------------------------|
| Human ICC1     | Zhang et al., 2020 | GSE142784,<br>GSM4240155 ICC24S  | ✓                              | ✓                                   | ✓                       | 2574                | 2397              | 177              | 0                                         | 1413           | 781             | 144              | 49                 | 187                                         |
| Human ICC2-1 * | Zhang et al., 2020 | GSE138709, GSM4116585            | ✓                              | ✓                                   | ✓                       | 124                 | 74                | 50               | 0                                         | 42             | 21              | 43               | 8                  | 10                                          |
| Human ICC2-2 * | Zhang et al., 2020 | GSE138709, GSM4116584            | ✓                              | ✓                                   | ✓                       | 218                 | 199               | 19               | 0                                         | 98             | 78              | 3                | 34                 | 5                                           |
| Human ICC2-3   | Zhang et al., 2020 | GSE138709, GSM4116583            | ✓                              | ✓                                   | ✓                       | 42                  | 42                | 0                | 0                                         | 24             | 12              | 0                | 6                  | 0                                           |
| Human ICC2-4   | Zhang et al., 2020 | GSE138709, GSM4116581            |                                |                                     |                         | 14                  | 14                | 0                | 0                                         | 2              | 11              | 0                | 0                  | 1                                           |
| Human ICC2-5   | Zhang et al., 2020 | GSE138709, GSM4116580            |                                |                                     |                         | 11                  | 11                | 0                | 0                                         | 6              | 0               | 0                | 0                  | 5                                           |
| Human ICC3-1   | Ma et al., 2019    | GSE125449 Set1,<br>S11_P06_LCP29 | ✓                              | ✓                                   | ✓                       | 150                 | 150               | 0                | 0                                         | 62             | 37              | 0                | 31                 | 20                                          |
| Human ICC3-2   | Ma et al., 2019    | GSE125449 Set1,<br>S09_P04_LCP25 |                                |                                     |                         | 24                  | 24                | 0                | 0                                         | 3              | 15              | 0                | 1                  | 5                                           |
| Human ICC3-3   | Ma et al., 2019    | GSE125449 Set1,<br>S08_P03_LCP26 |                                |                                     |                         | 13                  | 13                | 0                | 0                                         | 2              | 8               | 0                | 1                  | 2                                           |
| Human ICC3-4   | Ma et al., 2019    | GSE125449 Set1,<br>S12_P07_LCP30 |                                |                                     |                         | 16                  | 16                | 0                | 0                                         | 2              | 10              | 0                | 2                  | 2                                           |
| Human ICC3-5   | Ma et al., 2019    | GSE125449 Set1,<br>S20_P12_LCP35 |                                |                                     |                         | 37                  | 37                | 0                | 0                                         | 8              | 17              | 0                | 5                  | 7                                           |
| Human ICC3-6   | Ma et al., 2019    | GSE125449 Set1,<br>S19_P11_LCP39 |                                |                                     |                         | 12                  | 12                | 0                | 0                                         | 1              | 8               | 0                | 3                  | 0                                           |
| Human ICC4     | Zhang et al., 2020 | GSE142784,<br>GSM4240156 ICC32S  | ✓                              | ✓                                   |                         | 1228                | 1228              | 0                | 0                                         | 905            | 172             | 0                | 72                 | 79                                          |

\* Different tumors from same patient



|                     |                |                |                 |                |                  |                  |                  |                      |                 |                |               |
|---------------------|----------------|----------------|-----------------|----------------|------------------|------------------|------------------|----------------------|-----------------|----------------|---------------|
| <i>Acot7</i>        | <i>Bpgm</i>    | <i>Col4a5</i>  | <i>Dap</i>      | <i>Frem1</i>   | <i>Impdh1</i>    | <i>Mdk</i>       | <i>Olfml2b</i>   | <i>Plpp5</i>         | <i>Scpep1</i>   | <i>Speccl</i>  | <i>Tubb3</i>  |
| <i>Acta2</i>        | <i>Capg</i>    | <i>Col5a2</i>  | <i>Dbp</i>      | <i>Fst</i>     | <i>Inhba</i>     | <i>Medag</i>     | <i>P4ha2</i>     | <i>Pmepa1</i>        | <i>Sac1</i>     | <i>Spp1</i>    | <i>Tyms</i>   |
| <i>Actg2</i>        | <i>Cd59a</i>   | <i>Col5a3</i>  | <i>Ddah1</i>    | <i>Fstl1</i>   | <i>Im2a</i>      | <i>Meox1</i>     | <i>Pafah1b3</i>  | <i>Podxl2</i>        | <i>Serf1</i>    | <i>Srpx</i>    | <i>Uck2</i>   |
| <i>Adam19</i>       | <i>Cd9</i>     | <i>Col6a2</i>  | <i>Dpys13</i>   | <i>Fstl3</i>   | <i>Kctd11</i>    | <i>Mfap2</i>     | <i>Palld</i>     | <i>Prrx1</i>         | <i>Serpine2</i> | <i>Ste2</i>    | <i>Vcan</i>   |
| <i>Adcy7</i>        | <i>Cd93</i>    | <i>Col7a1</i>  | <i>Ebf1</i>     | <i>Fxyd5</i>   | <i>Kdelr3</i>    | <i>Mfap4</i>     | <i>Pcbp4</i>     | <i>Prss35</i>        | <i>Serpinf1</i> | <i>Stk17b</i>  | <i>Vegfa</i>  |
| <i>Ahna2</i>        | <i>Cda</i>     | <i>Col8a1</i>  | <i>Egln3</i>    | <i>Fxyd6</i>   | <i>Kij26b</i>    | <i>Mgll</i>      | <i>Pdgfr1</i>    | <i>Ptgfrn</i>        | <i>Sesn3</i>    | <i>Sulfl</i>   | <i>Vmp1</i>   |
| <i>Ak1</i>          | <i>Cdh11</i>   | <i>Colec12</i> | <i>Emp1</i>     | <i>Fzd1</i>    | <i>Kremen1</i>   | <i>Mgp</i>       | <i>Pdlim3</i>    | <i>Pik7</i>          | <i>Sfrp1</i>    | <i>Tfpi2</i>   | <i>Wisp1</i>  |
| <i>Akr1b8</i>       | <i>Cdkn2a</i>  | <i>Comtd1</i>  | <i>Eno1</i>     | <i>Gas7</i>    | <i>Lama4</i>     | <i>Mical2</i>    | <i>Pdzrn3</i>    | <i>Ptn</i>           | <i>Sh3bgr13</i> | <i>Tgfb3</i>   | <i>Wnt11</i>  |
| <i>Aldh1a2</i>      | <i>Cdkn2b</i>  | <i>Cop2</i>    | <i>Enpp1</i>    | <i>Gm15867</i> | <i>Lef1</i>      | <i>Minos1</i>    | <i>Pgam1</i>     | <i>Ptprb</i>         | <i>Sh3pxd2b</i> | <i>Thy1</i>    | <i>Zswin7</i> |
| <i>Ank</i>          | <i>Cercam</i>  | <i>Col1</i>    | <i>Env4</i>     | <i>Gng11</i>   | <i>Lefly1</i>    | <i>Mmp14</i>     | <i>Pgf</i>       | <i>Rab7b</i>         | <i>Shisa4</i>   | <i>Thyn1</i>   |               |
| <i>Ankrd37</i>      | <i>Ch25h</i>   | <i>Cox4i2</i>  | <i>Evl</i>      | <i>Gpar1</i>   | <i>Lgals1</i>    | <i>Mmp2</i>      | <i>Pgk1</i>      | <i>Rap2b</i>         | <i>Siva1</i>    | <i>Timp1</i>   |               |
| <i>Anpep</i>        | <i>Chst11</i>  | <i>Cpxm2</i>   | <i>Fam198b</i>  | <i>Gpc1</i>    | <i>Lgi2</i>      | <i>Mtch1</i>     | <i>Piezo2</i>    | <i>Rapgef4</i>       | <i>Slc16a3</i>  | <i>Tm4sf1</i>  |               |
| <i>Aoc1</i>         | <i>Chst2</i>   | <i>Crjfl</i>   | <i>Fam20a</i>   | <i>Gpm6b</i>   | <i>Lhfp12</i>    | <i>Nbl1</i>      | <i>Pik3ip1</i>   | <i>Rgs16</i>         | <i>Slc27a1</i>  | <i>Tmem2</i>   |               |
| <i>Apol9a</i>       | <i>Clecl1a</i> | <i>Csrp2</i>   | <i>Fam20c</i>   | <i>Gpr153</i>  | <i>Lsp1</i>      | <i>Ncam1</i>     | <i>Pkn</i>       | <i>Rgs19</i>         | <i>Slc39a14</i> | <i>Tmem45a</i> |               |
| <i>Aprt</i>         | <i>Clmp</i>    | <i>Ctcr1</i>   | <i>Fam69b</i>   | <i>Hlf0</i>    | <i>Ltbp2</i>     | <i>Ndufa412</i>  | <i>Pla1a</i>     | <i>Rnf149</i>        | <i>Slc7a2</i>   | <i>Tnc</i>     |               |
| <b>MOUSE mesCAF</b> |                |                |                 |                |                  |                  |                  |                      |                 |                |               |
| <i>Adgrd1</i>       | <i>Cd2ap</i>   | <i>Flr2</i>    | <i>Igfbp6</i>   | <i>Mmd</i>     | <i>Rbbp8</i>     | <i>Slc9a3r1</i>  | <i>Tmem98</i>    |                      |                 |                |               |
| <i>Angptl7</i>      | <i>Celf2</i>   | <i>Fth1</i>    | <i>Il18</i>     | <i>Msln</i>    | <i>Rspo1</i>     | <i>Sipi</i>      | <i>Tnfrsf12a</i> |                      |                 |                |               |
| <i>Anxa3</i>        | <i>Cpe</i>     | <i>Gas6</i>    | <i>Krt18</i>    | <i>Ndr1</i>    | <i>S100a1</i>    | <i>Smpd3</i>     | <i>Tnfrsf12a</i> |                      |                 |                |               |
| <i>Atp1b1</i>       | <i>Cxadr</i>   | <i>Gm20186</i> | <i>Krt7</i>     | <i>Ndufa4</i>  | <i>Saa3</i>      | <i>Snrpg</i>     | <i>Trf</i>       |                      |                 |                |               |
| <i>Bcd1</i>         | <i>Dab2</i>    | <i>Gm8186</i>  | <i>Krt8</i>     | <i>Nkain4</i>  | <i>Sbsn</i>      | <i>Spint2</i>    | <i>Ucp2</i>      |                      |                 |                |               |
| <i>C3</i>           | <i>Ddr1</i>    | <i>Gpc3</i>    | <i>Ldhb</i>     | <i>Pdgfc</i>   | <i>Serpinh6b</i> | <i>Simn1</i>     | <i>Upk1b</i>     |                      |                 |                |               |
| <i>Cd151</i>        | <i>Ezr</i>     | <i>Gpm6a</i>   | <i>Lgals3</i>   | <i>Pdpn</i>    | <i>Shb</i>       | <i>Tcea3</i>     | <i>Upk3b</i>     |                      |                 |                |               |
| <i>Cd200</i>        | <i>Fbxo33</i>  | <i>Hspb1</i>   | <i>Lrrn4</i>    | <i>Rab11a</i>  | <i>Slc39a8</i>   | <i>Tmem151a</i>  | <i>W1</i>        |                      |                 |                |               |
| <b>HUMAN iCAF</b>   |                |                |                 |                |                  |                  |                  |                      |                 |                |               |
| <i>ADAMTS4</i>      | <i>AGT</i>     | <i>APOE</i>    | <i>ARHGDI1B</i> | <i>CCL19</i>   | <i>CCL21</i>     | <i>COLEC11</i>   | <i>CPE</i>       | <i>GEM</i>           | <i>GJA4</i>     |                |               |
| <i>GPX3</i>         | <i>HIGD1B</i>  | <i>IL6</i>     | <i>ISYNA1</i>   | <i>LHFP</i>    | <i>MAP1B</i>     | <i>MT1A</i>      | <i>NDUFA4L2</i>  | <i>PKD4</i>          | <i>RGS5</i>     |                |               |
| <b>HUMAN myCAF</b>  |                |                |                 |                |                  |                  |                  |                      |                 |                |               |
| <i>APOD</i>         | <i>CCL11</i>   | <i>COL1A1</i>  | <i>COL1A2</i>   | <i>COL3A1</i>  | <i>COL5A1</i>    | <i>COL6A3</i>    | <i>CTGF</i>      | <i>CTHRC1</i>        | <i>CYP11B1</i>  | <i>FNI</i>     |               |
| <i>INHBA</i>        | <i>ISLR</i>    | <i>LUM</i>     | <i>MMP14</i>    | <i>POSTN</i>   | <i>PTGDS</i>     | <i>SERPINF1</i>  | <i>SFRP2</i>     | <i>SPON2</i>         | <i>VCAN</i>     |                |               |
| <b>HUMAN mesCAF</b> |                |                |                 |                |                  |                  |                  |                      |                 |                |               |
| <i>ANXA1</i>        | <i>ANXA2</i>   | <i>BDKRB1</i>  | <i>C19orf33</i> | <i>C3</i>      | <i>CALB2</i>     | <i>CCDC80</i>    | <i>CFB</i>       | <i>CRABP2</i>        |                 |                |               |
| <i>CXCL1</i>        | <i>CXCL6</i>   | <i>EFEMP1</i>  | <i>EGFL6</i>    | <i>EMP3</i>    | <i>EZR</i>       | <i>HMOX1</i>     | <i>HP</i>        | <i>HSPA6</i>         |                 |                |               |
| <i>IFI27</i>        | <i>IGFBP6</i>  | <i>ITLN1</i>   | <i>KRT18</i>    | <i>KRT19</i>   | <i>KRT8</i>      | <i>LINC01133</i> | <i>LOX</i>       | <i>MT1E</i>          |                 |                |               |
| <i>MT1G</i>         | <i>MT1X</i>    | <i>MXRA5</i>   | <i>PDPN</i>     | <i>PLA2G2A</i> | <i>PRG4</i>      | <i>PRSS23</i>    | <i>PTGIS</i>     | <i>RP11-572C15.6</i> |                 |                |               |
| <i>S100A10</i>      | <i>S100A16</i> | <i>S100A6</i>  | <i>SAA1</i>     | <i>SAA2</i>    | <i>SERPINE2</i>  | <i>SH3BGL3</i>   | <i>SLC12A8</i>   | <i>SLPI</i>          | <i>TM4SF1</i>   |                |               |



|                                                                                                       |            |      |       |             |     |    |    |    |             |    |    |             |    |    |
|-------------------------------------------------------------------------------------------------------|------------|------|-------|-------------|-----|----|----|----|-------------|----|----|-------------|----|----|
| epithelial cell proliferation                                                                         | GO:0050673 | 429  | 21354 | 1           | 81  | 6  | 38 | 5  | 0.005504332 | 59 | 9  | 0.26239298  | 94 | 9  |
| ovulation cycle                                                                                       | GO:0042698 | 84   | 21354 | 0.003359416 | 90  | 6  | 34 | 1  | 1           | 50 | 3  | 0.268790672 | 64 | 4  |
| Drug metabolism - other enzymes                                                                       | KEGG:00983 | 88   | 8477  | 0.766693576 | 1   | 1  | 12 | 3  | 0.105508027 | 22 | 3  | 0.312597491 | 32 | 3  |
| response to organic substance                                                                         | GO:0010033 | 3434 | 21354 | 0.054186759 | 96  | 32 | 41 | 18 | 0.02613305  | 85 | 30 | 0.339735166 | 87 | 28 |
| retinoic acid binding                                                                                 | GO:0001972 | 16   | 21091 | 0.412292076 | 1   | 1  | 1  | 1  | 0.006497501 | 7  | 2  | 0.412292076 | 1  | 1  |
| response to vitamin D                                                                                 | GO:0033280 | 34   | 21354 | 1           | 73  | 2  | 33 | 2  | 0.028210783 | 91 | 4  | 0.463704759 | 72 | 3  |
| enzyme linked receptor protein signaling pathway                                                      | GO:0007167 | 918  | 21354 | 1           | 50  | 8  | 45 | 8  | 0.030949112 | 96 | 15 | 0.615961375 | 85 | 12 |
| establishment of planar polarity                                                                      | GO:0001736 | 63   | 21354 | 1           | -1  | -1 | 46 | 2  | 0.023886084 | 99 | 5  | 0.675713007 | 44 | 3  |
| establishment of tissue polarity                                                                      | GO:0007164 | 64   | 21354 | 1           | -1  | -1 | 46 | 2  | 0.025815633 | 99 | 5  | 0.707927442 | 44 | 3  |
| organic acid metabolic process                                                                        | GO:0006082 | 948  | 21354 | 1           | 100 | 12 | 59 | 13 | 1           | 73 | 10 | 0.711685349 | 50 | 9  |
| response to nutrient                                                                                  | GO:0007584 | 191  | 21354 | 1           | 73  | 4  | 35 | 5  | 0.038299754 | 91 | 7  | 0.820203001 | 38 | 4  |
| retinoid binding                                                                                      | GO:0005501 | 34   | 21091 | 0.876120661 | 1   | 1  | 35 | 2  | 6.39148E-05 | 73 | 5  | 0.876120661 | 1  | 1  |
| cellular response to organic substance                                                                | GO:0071310 | 2461 | 21354 | 0.074678934 | 51  | 17 | 41 | 16 | 0.142191115 | 85 | 23 | 0.88319428  | 72 | 19 |
| response to vitamin                                                                                   | GO:0033273 | 105  | 21354 | 1           | 73  | 2  | 35 | 3  | 0.012639842 | 91 | 6  | 0.998213458 | 72 | 4  |
| isoprenoid binding                                                                                    | GO:0019840 | 39   | 21091 | 1           | 1   | 1  | 1  | 1  | 0.000130485 | 73 | 5  | 1           | 1  | 1  |
| oxidoreductase activity, acting on paired donors, with incorporation or reduction of molecular oxygen | GO:0016705 | 221  | 21091 | 0.930457494 | 82  | 5  | 87 | 7  | 1           | 73 | 2  | 1           | 80 | 4  |
| hyaluronan synthase activity                                                                          | GO:0050501 | 4    | 21091 | 0.024150363 | 58  | 2  | 34 | 1  | 1           | 44 | 1  | 1           | 26 | 1  |
| monooxygenase activity                                                                                | GO:0004497 | 160  | 21091 | 1           | 29  | 2  | 87 | 6  | 1           | 73 | 2  | 1           | 76 | 3  |
| cell morphogenesis involved in differentiation                                                        | GO:0000904 | 767  | 21354 | 1           | 76  | 7  | 94 | 10 | 0.00096158  | 87 | 15 | 1           | 98 | 11 |
| midgut development                                                                                    | GO:0007494 | 12   | 21354 | 1           | 19  | 1  | 51 | 3  | 1           | 34 | 1  | 1           | 97 | 2  |
| cellular response to growth factor stimulus                                                           | GO:0071363 | 671  | 21354 | 1           | 94  | 8  | 34 | 6  | 0.029504316 | 85 | 12 | 1           | 71 | 8  |
| cellular response to endogenous stimulus                                                              | GO:0071495 | 1329 | 21354 | 0.315544868 | 48  | 11 | 38 | 10 | 0.034857925 | 85 | 17 | 1           | 64 | 11 |
| cell development                                                                                      | GO:0048468 | 2361 | 21354 | 1           | 90  | 17 | 86 | 14 | 0.035493224 | 87 | 24 | 1           | 98 | 21 |
| rhythmic process                                                                                      | GO:0048511 | 347  | 21354 | 0.035959652 | 90  | 9  | 83 | 2  | 1           | 82 | 5  | 1           | 64 | 4  |
| monocarboxylic acid metabolic process                                                                 | GO:0032787 | 616  | 21354 | 1           | 100 | 9  | 95 | 12 | 1           | 73 | 8  | 1           | 50 | 7  |
| response to extracellular stimulus                                                                    | GO:0009991 | 566  | 21354 | 1           | 6   | 2  | 72 | 10 | 1           | 55 | 7  | 1           | 38 | 6  |
| digestive tract development                                                                           | GO:0048565 | 138  | 21354 | 1           | 19  | 1  | 51 | 5  | 1           | 68 | 4  | 1           | 38 | 3  |
| response to growth factor                                                                             | GO:0070848 | 698  | 21354 | 1           | 58  | 6  | 34 | 6  | 0.043605217 | 85 | 12 | 1           | 71 | 8  |
| extracellular polysaccharide metabolic process                                                        | GO:0046379 | 3    | 21354 | 0.049348422 | 58  | 2  | 34 | 1  | 1           | 44 | 1  | 1           | 26 | 1  |
| extracellular polysaccharide biosynthetic process                                                     | GO:0045226 | 3    | 21354 | 0.049348422 | 58  | 2  | 34 | 1  | 1           | 44 | 1  | 1           | 26 | 1  |
| Factor: GLI; motif: NSTGGGTGGTCY                                                                      | TF:M10254  | 9881 | 21859 | 1           | 94  | 53 | 90 | 61 | 0.022650143 | 82 | 56 | 1           | 90 | 55 |
| Factor: Smad2; motif: NCTGYCTGN                                                                       | TF:M10366  | 6664 | 21859 | 1           | 82  | 37 | 88 | 45 | 1           | 95 | 40 | 1           | 45 | 22 |







|                                                              |              |             |           |      |    |    |       |                                                                                                                                                         |
|--------------------------------------------------------------|--------------|-------------|-----------|------|----|----|-------|---------------------------------------------------------------------------------------------------------------------------------------------------------|
| cell differentiation                                         | GO:0030154   | 0.038207701 | 1.4178491 | 4248 | 34 | 18 | 21257 | LEF1,PTN,HAS2,MEOX1,CDKN2A,MEGF10,SERPINF1,COL8A1,CDKN2B,FBN2,ROR2,COL7A1,ETV4,SFRP1,WNT11,TMEFF1,CSPG4,FST                                             |
| gland morphogenesis                                          | GO:0022612   | 0.038280124 | 1.4170267 | 139  | 25 | 4  | 21257 | PTN,CDKN2A,ETV4,SFRP1                                                                                                                                   |
| negative regulation of multicellular organismal process      | GO:0051241   | 0.040857245 | 1.3887309 | 1326 | 33 | 10 | 21257 | LEF1,PTN,CDKN2A,SERPINF1,CDKN2B,ETV4,SFRP1,WNT11,ADCY7,CSPG4                                                                                            |
| epithelial to mesenchymal transition                         | GO:0001837   | 0.042519125 | 1.3714157 | 137  | 26 | 4  | 21257 | LEF1,HAS2,SFRP1,WNT11                                                                                                                                   |
| negative regulation of biological process                    | GO:0048519   | 0.047486952 | 1.3234257 | 5477 | 26 | 17 | 21257 | NOTUM,DKK2,LEF1,PTN,CRLF1,ITIH5,CDKN2A,SERPINF1,NKD2,CDKN2B,FBN2,ROR2,COL7A1,GFRA2,ETV4,SFRP1,WNT11                                                     |
| cellular response to platelet-derived growth factor stimulus | GO:0036120   | 0.048107092 | 1.3177909 | 28   | 6  | 2  | 21257 | PTN,HAS2                                                                                                                                                |
| collagen-containing extracellular matrix                     | GO:0062023   | 1.87E-11    | 10.727259 | 339  | 43 | 13 | 21187 | PTN,ITIH5,COL15A1,SERPINF1,COL8A1,FBN2,COL7A1,SFRP1,TMEFF1,CSPG4,S100A6,MFAP4,PCOLCE2                                                                   |
| extracellular matrix                                         | GO:0031012   | 3.25E-11    | 10.487735 | 452  | 43 | 14 | 21187 | PTN,ITIH5,COL15A1,SERPINF1,COL8A1,FBN2,COL7A1,SFRP1,WNT11,TMEFF1,CSPG4,S100A6,MFAP4,PCOLCE2                                                             |
| extracellular region                                         | GO:0005576   | 5.76E-07    | 6.2396066 | 2713 | 44 | 22 | 21187 | NOTUM,DKK2,PTN,CRLF1,ITIH5,COL15A1,SERPINF1,AMN,COL8A1,FBN2,COL7A1,SFRP1,WNT11,PRSS35,TMEFF1,CSPG4,FST,S100A6,PLA1A,MFAP4,PCOLCE2,TNFRSF9               |
| basement membrane                                            | GO:0005604   | 2.18E-06    | 5.6623636 | 104  | 32 | 6  | 21187 | PTN,COL15A1,SERPINF1,COL8A1,COL7A1,TMEFF1                                                                                                               |
| extracellular space                                          | GO:0005615   | 0.003622364 | 2.4410079 | 1885 | 44 | 14 | 21187 | DKK2,PTN,CRLF1,COL15A1,SERPINF1,AMN,COL8A1,COL7A1,SFRP1,WNT11,FST,PLA1A,MFAP4,TNFRSF9                                                                   |
| collagen trimer                                              | GO:0005581   | 0.022181242 | 1.6540141 | 88   | 22 | 3  | 21187 | COL15A1,COL8A1,COL7A1                                                                                                                                   |
| microfibril                                                  | GO:0001527   | 0.039580835 | 1.4025151 | 11   | 39 | 2  | 21187 | FBN2,MFAP4                                                                                                                                              |
| Wnt signaling pathway                                        | KEGG:04310   | 5.64E-05    | 4.248439  | 152  | 26 | 7  | 6926  | NOTUM,DKK2,LEF1,NKD2,ROR2,SFRP1,WNT11                                                                                                                   |
| Cushing syndrome                                             | KEGG:04934   | 0.017493086 | 1.7571336 | 146  | 29 | 5  | 6926  | LEF1,CDKN2A,CDKN2B,WNT11,ADCY7                                                                                                                          |
| Collagen chain trimerization                                 | C:R-MMU-8948 | 0.026137604 | 1.5827342 | 38   | 22 | 3  | 8671  | COL15A1,COL8A1,COL7A1                                                                                                                                   |
| Collagen biosynthesis and modifying enzymes                  | C:R-MMU-1650 | 0.045313253 | 1.3437748 | 59   | 43 | 4  | 8671  | COL15A1,COL8A1,COL7A1,PCOLCE2                                                                                                                           |
| Factor: AP-2; motif: SNNCCNCAGGCN; match class: 1            | TF:M00915_1  | 0.010591738 | 1.9750328 | 2395 | 48 | 17 | 21846 | NOTUM,LEF1,LRRC55,CRLF1,SERPINF1,NKD2,CDKN2B,FBN2,ROR2,ADCY7,ACTG2,TMEFF1,FST,MFAP4,VCAN,CPXM2,DOK5                                                     |
| Factor: Smad4; motif: NCAGACAN; match class: 0               | TF:M07368_0  | 0.010657189 | 1.9723573 | 5290 | 40 | 23 | 21846 | DKK2,LRRC55,HAS2,CRLF1,MEOX1,CDKN2A,MEGF10,SERPINF1,COL8A1,NKD2,COL7A1,ETV4,SFRP1,WNT11,D630003M21RIK,PRSS35,ADCY7,ACTG2,TMEFF1,CSPG4,S100A6,MFAP4,LSP1 |
| Factor: Smad4; motif: NCAGACAN                               | TF:M07368    | 0.010657189 | 1.9723573 | 5290 | 40 | 23 | 21846 | DKK2,LRRC55,HAS2,CRLF1,MEOX1,CDKN2A,MEGF10,SERPINF1,COL8A1,NKD2,COL7A1,ETV4,SFRP1,WNT11,D630003M21RIK,PRSS35,ADCY7,ACTG2,TMEFF1,CSPG4,S100A6,MFAP4,LSP1 |
| Factor: Sp3; motif: ASMCTGGGSRGGG; match class: 1            | TF:M00665_1  | 0.018213747 | 1.7396007 | 1757 | 41 | 13 | 21846 | LEF1,CRLF1,MEOX1,MEGF10,FBN2,INSC,COL7A1,ETV4,WNT11,CSPG4,FST,NREP,VCAN                                                                                 |
| Factor: FKLf; motif: BGGGNGGVMd; match class: 1              | TF:M01837_1  | 0.026764655 | 1.5724384 | 985  | 27 | 8  | 21846 | DKK2,LEF1,HAS2,NKD2,ROR2,GFRA2,ETV4,D630003M21RIK                                                                                                       |
| Factor: WT1; motif: SMCNCCNSC                                | TF:M01118    | 0.032278059 | 1.4910926 | 8133 | 27 | 21 | 21846 | NOTUM,DKK2,LEF1,HAS2,CRLF1,MEOX1,ITIH5,CDKN2A,MEGF10,AMN,NKD2,CDKN2B,FBN2,INSC,ROR2,COL7A1,GFRA2,ETV4,SFRP1,WNT11,D630003M21RIK                         |
| Factor: WT1; motif: SMCNCCNSC; match class: 0                | TF:M01118_0  | 0.032278059 | 1.4910926 | 8133 | 27 | 21 | 21846 | NOTUM,DKK2,LEF1,HAS2,CRLF1,MEOX1,ITIH5,CDKN2A,MEGF10,AMN,NKD2,CDKN2B,FBN2,INSC,ROR2,COL7A1,GFRA2,ETV4,SFRP1,WNT11,D630003M21RIK                         |

Table S6 (Related to Figure 6). Combined top DGE core matrisome filtered CAF YAP/AKT and KRAS/p19 versus quiescent HSC.

| Gene        | baseMean        | log2FoldChange<br>YAP/AKT | lfcSE         | stat           | pvalue          | padj            | baseMean        | log2FoldChange<br>KRAS/p19 | lfcSE         | stat           | pvalue          | padj            | Sum log2Fold<br>Kras/p19 and<br>YAP/AKT |                       |
|-------------|-----------------|---------------------------|---------------|----------------|-----------------|-----------------|-----------------|----------------------------|---------------|----------------|-----------------|-----------------|-----------------------------------------|-----------------------|
| Mgp         | 9960.9976       | 13.3806                   | 0.6823        | -19.6120       | 1.22E-85        | 1.11E-82        | 4142.7631       | 12.1766                    | 0.5451        | -22.3367       | 1.63E-110       | 1.36E-107       | 25.5572                                 | Core Matrisome        |
| Col6a5      | 2969.9244       | 13.1437                   | 1.1259        | -11.6744       | 1.72E-31        | 1.79E-29        | 967.4053        | 11.6372                    | 0.9047        | -12.8630       | 7.27E-38        | 6.65E-36        | 24.7809                                 | Core Matrisome        |
| Spp1        | 15673.0196      | 12.0905                   | 0.5016        | -24.1062       | 2.15E-128       | 9.40E-125       | 15253.7126      | 12.1529                    | 0.4242        | -28.6461       | 1.79E-180       | 4.34E-177       | 24.2434                                 | Core Matrisome        |
| Col6a6      | 963.6615        | 12.6791                   | 1.3962        | -9.0814        | 1.07E-19        | 4.95E-18        | 231.4441        | 10.6974                    | 1.6731        | -6.3936        | 1.62E-10        | 2.27E-09        | 23.3765                                 | Core Matrisome        |
| Coll5a1     | 15353.4502      | 11.2533                   | 0.8004        | -14.0593       | 6.76E-45        | 1.45E-42        | 12457.9640      | 11.1875                    | 0.8002        | -13.9810       | 2.04E-44        | 2.28E-42        | 22.4408                                 | Core Matrisome        |
| Mfap4       | 2391.5150       | 11.4487                   | 1.1358        | -10.0801       | 6.76E-24        | 4.32E-22        | 1234.1193       | 10.5493                    | 1.2482        | -8.4515        | 2.88E-17        | 7.83E-16        | 21.9980                                 | Core Matrisome        |
| Fbn2        | 9533.2964       | 11.5753                   | 0.4199        | -27.5667       | 2.79E-167       | 2.03E-163       | 1643.1586       | 9.1123                     | 0.3408        | -26.7375       | 1.72E-157       | 3.76E-154       | 20.6877                                 | Core Matrisome        |
| Cilp        | 1370.9420       | 10.3084                   | 1.0201        | -10.1053       | 5.23E-24        | 3.39E-22        | 1237.1727       | 10.2419                    | 0.8896        | -11.5124       | 1.14E-30        | 7.41E-29        | 20.5503                                 | Core Matrisome        |
| Dmbt1       | 289.6714        | 11.0294                   | 2.0308        | -5.4310        | 5.60E-08        | 6.41E-07        | 94.1498         | 9.4647                     | 1.1964        | -7.9113        | 2.55E-15        | 5.89E-14        | 20.4941                                 | Core Matrisome        |
| Igfbp5      | 5785.2698       | 10.7093                   | 0.4993        | -21.4477       | 4.79E-102       | 1.16E-98        | 2744.1844       | 9.7364                     | 0.3274        | -29.7352       | 2.70E-194       | 7.34E-191       | 20.4457                                 | Core Matrisome        |
| Lamc3       | 434.4838        | 10.7764                   | 1.4269        | -7.5524        | 4.27E-14        | 1.14E-12        | 176.7730        | 9.5884                     | 1.0171        | -9.4270        | 4.22E-21        | 1.47E-19        | 20.3648                                 | Core Matrisome        |
| <b>Has2</b> | <b>240.0764</b> | <b>10.0202</b>            | <b>1.0867</b> | <b>-9.2209</b> | <b>2.95E-20</b> | <b>1.44E-18</b> | <b>266.4770</b> | <b>10.2429</b>             | <b>1.0519</b> | <b>-9.7375</b> | <b>2.09E-22</b> | <b>8.13E-21</b> | <b>20.2631</b>                          | <b>Core Matrisome</b> |
| Igfbp6      | 243.2684        | 10.0338                   | 1.1285        | -8.8914        | 6.03E-19        | 2.58E-17        | 250.1232        | 10.1387                    | 1.0424        | -9.7263        | 2.33E-22        | 9.04E-21        | 20.1726                                 | Core Matrisome        |
| Coll10a1    | 48.5075         | 9.1512                    | 1.1911        | -7.6831        | 1.55E-14        | 4.41E-13        | 91.6773         | 10.1460                    | 1.0657        | -9.5208        | 1.72E-21        | 6.18E-20        | 19.2973                                 | Core Matrisome        |
| Col28a1     | 67.8336         | 9.6355                    | 1.1450        | -8.4152        | 3.92E-17        | 1.43E-15        | 62.1539         | 9.5822                     | 1.1508        | -8.3268        | 8.31E-17        | 2.20E-15        | 19.2177                                 | Core Matrisome        |
| Npnt        | 33.5049         | 8.6128                    | 1.1403        | -7.5534        | 4.24E-14        | 1.13E-12        | 58.0432         | 9.4710                     | 1.1570        | -8.1861        | 2.70E-16        | 6.80E-15        | 18.0838                                 | Core Matrisome        |
| Thbs4       | 327.9637        | 9.2556                    | 1.2470        | -7.4220        | 1.15E-13        | 2.93E-12        | 197.6863        | 8.5902                     | 1.3166        | -6.5247        | 6.82E-11        | 9.90E-10        | 17.8458                                 | Core Matrisome        |
| Smoc1       | 231.6377        | 8.6320                    | 0.8131        | -10.6162       | 2.50E-26        | 1.87E-24        | 147.9011        | 8.0631                     | 0.6929        | -11.6363       | 2.69E-31        | 1.83E-29        | 16.6951                                 | Core Matrisome        |
| Mfap5       | 41.7127         | 6.7429                    | 1.0069        | -6.6968        | 2.13E-11        | 4.14E-10        | 332.4165        | 9.7752                     | 0.8407        | -11.6270       | 3.00E-31        | 2.03E-29        | 16.5181                                 | Core Matrisome        |
